1 ***In vitro* and *in vivo* analysis of microvesicle-mediated metastasis**  
2 **using a bright, red-shifted bioluminescent reporter protein of**  
3 **extracellular vesicles**

4

5 Ahmed A. Zarea\*<sup>1</sup>, Gloria I. Perez\*<sup>1,2</sup>, David Broadbent<sup>1,2</sup>, Benedikt Dolgikh<sup>1,4</sup>, Matthew  
6 P. Bernard<sup>1,3</sup>, Alicia Withrow<sup>8</sup>, Amelia McGill<sup>1</sup>, Victoria Toomajian<sup>1,5</sup>, Lukose K.  
7 Thampy<sup>1,2</sup>, Jack Harkema<sup>3</sup>, Joel R. Walker<sup>9</sup>, Thomas A. Kirkland<sup>9</sup>, Michael H.  
8 Bachmann<sup>1,6</sup>, Jens Schmidt<sup>1,7</sup>, and Masamitsu Kanada\*\*<sup>1,3</sup>

9

10 **Affiliations**

11 <sup>1</sup>Institute for Quantitative Health Science and Engineering (IQ), <sup>2</sup>College of Osteopathic  
12 Medicine, <sup>3</sup>Department of Pharmacology & Toxicology, <sup>4</sup>College of Natural Science,  
13 <sup>5</sup>Department of Biomedical Engineering, <sup>6</sup>Department of Microbiology & Molecular  
14 Genetics, <sup>7</sup>Department of Obstetrics and Gynecology, College of Human Medicine,  
15 <sup>8</sup>Center for Advanced Microscopy, Michigan State University, East Lansing, Michigan.  
16 <sup>9</sup>Promega Biosciences LLC, 227 Granada Dr, San Luis Obispo, CA.

17

18 \*These authors contributed equally to this work.

19

20 \*\*Corresponding author: Masamitsu Kanada, Michigan State University, 775 Woodlot Dr.  
21 East Lansing, MI 48824. Phone: (517) 884-6933; Fax: (517) 884-7463; E-mail:  
22 kanadama@msu.edu

23

24

## 25 **Abstract**

26 Cancer cells produce heterogeneous extracellular vesicles (EVs) as mediators of  
27 intercellular communication. Our study focused on a novel method to image EV subtypes  
28 and their biodistribution *in vivo*. Regardless of injection routes, we established that  
29 reporter EVs isolated from murine mammary carcinoma cells expressing PalmReNL,  
30 which utilizes bioluminescence resonance energy transfer (BRET), localized to the lungs.  
31 This new EV reporter allowed highly sensitive EV tracking *in vitro* and *in vivo* and enabled  
32 us to begin studies to understand the commonalities and functional differences of the EV  
33 subtypes. We demonstrated the early appearance of metastatic foci in the lungs of  
34 mammary tumor-bearing mice following multiple injections of the microvesicle (MV)-  
35 enriched fraction derived from mammary carcinoma cells. In addition, the results we  
36 present here show that tumor cell-derived MVs act on distant tissues through upregulating  
37 LC3 expression within the lung.

38

39

## 40 **Introduction**

41 Extracellular vesicles (EVs) are spherical lipid bilayered structures naturally shed by cells  
42 and have been implicated in the pathogenesis of cancer and numerous other diseases<sup>1,2</sup>.  
43 Understanding their biodistribution and ultimate targets is key to elucidating their roles in  
44 health and disease<sup>3,4</sup>. EV subtypes include exosomes and microvesicles (MVs), which  
45 are distinguished based on their size and biogenesis<sup>1,2</sup>. Exosomes range from ~30-120  
46 nm in diameter and are produced by inward budding of the late endosomal membrane,  
47 known as multivesicular bodies (MVBs). MVs are 50-1000 nm in diameter and produced  
48 by simple outward budding of the plasma membrane. Due to their nano-size and  
49 biophysical properties, both types of EVs have the potential to cross biological barriers  
50 and gain access into host cells beyond these barriers<sup>5-7</sup>. In this manner, released EVs act  
51 as mediators of intercellular communication in the body<sup>8,9</sup>. For example, numerous  
52 studies have demonstrated that cancer cells can appropriate this communication pathway  
53 by transferring active biomolecules to adjacent and distant cancer cells, promoting their  
54 growth and survival<sup>2,10</sup>. For this reason, EV-mediated signaling may hold promising  
55 cancer treatment strategies and be an effective platform for drug delivery. However,  
56 systemic administration of nano-sized EVs may reach and accumulate in other sites  
57 beyond the tissues of therapeutic interest<sup>11-13</sup>. Therefore, analysis of the biodistribution  
58 following EV administration is a prerequisite for the development of EV-based  
59 therapeutics.

60 Characterization of EV biodistribution, however, is restricted by the biological tools  
61 available, which are not sensitive enough to localize and track small EVs *in vivo*. In this  
62 study, we develop a novel EV reporter system that enables highly sensitive EV tracking.

63 Non-invasive *in vivo* bioluminescence imaging combined with molecular and cellular  
64 analyses offers unique potential to facilitate the preclinical evaluation of biological  
65 therapies in animal models. Additionally, most *in vivo* studies of EV-mediated signaling  
66 have only used immune-compromised mice<sup>3,14</sup> and require further assessment in the  
67 presence of an intact immune system. In our current studies, combining *in vitro* and *in*  
68 *vivo* approaches with immunocompetent mice, we expect to uncover some of the  
69 biological characteristics of EVs, such as trafficking, cellular uptake and release.

70

## 71 **Results**

### 72 **Overexpression of PalmReNL labeled both exosomes and MVs.**

73 We developed PalmReNL, a novel EV imaging probe, by genetically fusing a  
74 palmitoylation signal peptide<sup>15</sup> to one of the brightest red-shifted bioluminescence  
75 resonance energy transfer (BRET) reporters, Red-eNanoLantern (ReNL)<sup>16</sup> (Fig. 1a). We  
76 observed that PalmReNL supplied with its substrate furimazine (Fz) produced red-shifted  
77 luminescence similar to that of ReNL without palmitoylation, indicating that membrane-  
78 anchoring of ReNL does not affect its BRET efficiency (Fig. 1b). This EV reporter has an  
79 advantage for *in vivo* tracking since bioluminescence imaging produces negligible  
80 background signals. Also, photons with spectral wavelengths longer than 600 nm can  
81 efficiently penetrate mammalian tissues with less light attenuation than observed with  
82 shorter wavelength light. Moreover, PalmReNL can be used as a fluorescent EV reporter  
83 by exciting tdTomato for standard flow cytometry and microscope settings.

84 As reported previously<sup>15</sup>, the results of the experiments to determine the membrane  
85 orientation of PalmReNL in EVs, revealed that PalmReNL can label the inner membrane  
86 leaflet of both exosomes and MVs. However, there were differences in the outer  
87 membrane labeling by PalmReNL between exosome- and MV-enriched fractions. As  
88 demonstrated by both the dot blot (Supplementary Fig. 1f-i) and the proteinase-K  
89 protection assays (Fig. 1c, d), in exosomes the reporter was protected from Proteinase-  
90 K, hence localized primarily to the inner membrane. In contrast, in MVs PalmReNL was  
91 sensitive to Proteinase-K without detergent treatment, indicating that it localized to both  
92 the inner and the outer membranes. This dual-labeling of exosomes and MVs represents  
93 an advantage over other widely used CD63-based EV reporters that only label one  
94 specific EV subtype, exosomes<sup>17</sup>.

95 We next assessed the labeling efficiency in isolated exosome- and MV-enriched fractions  
96 from 4T1 cells stably expressing PalmReNL. Firstly, exosomes and MVs were isolated  
97 from the conditioned medium as we previously reported<sup>18,19</sup> and characterized by  
98 nanoparticle tracking analysis (NTA). The concentration of MVs expressing PalmReNL  
99 was  $7.7 \times 10^{10}$  particles/mL and the mean diameter was 119 nm (Supplementary Fig. 1b),  
100 while the concentration of exosomes expressing PalmReNL was  $1.9 \times 10^{10}$  particles/mL  
101 and the mean diameter was 105 nm (Supplementary Fig. 1a). The concentrations and  
102 mean diameters of exosome- and MV-enriched fractions derived from control 4T1 cells  
103 were  $1.9 \times 10^{10}$  particles/mL and 102 nm,  $2.7 \times 10^{10}$  particles/mL and 117 nm,  
104 respectively (Supplementary Fig. 1c, d). Therefore, the genetic addition of the reporter  
105 did not inhibit the release of EVs nor influence their sizes. Determination of the Zeta  
106 potential revealed that the PalmReNL slightly shifted the surface charge of exosomes,

107 but not MVs (Supplementary Fig. 1e). Consistent with the NTA data, the transmission  
108 electron microscopy (TEM) analysis of the exosome- and MV-enriched fractions revealed  
109 a heterogeneous mixture of predominantly intact vesicles with artefactual cup-shaped  
110 morphology<sup>20</sup> having diameters ranging from 50 to 200 nm, and expressing the tdTomato  
111 as ReNL is a fusion protein of NanoLuc and tdTomato<sup>16</sup> (Fig. 1h, i). There was no  
112 significant morphological change in the EV fractions expressing PalmReNL.

113 Western blot (WB) analysis of exosome marker proteins in immunoblots of whole-cell  
114 lysates and EVs derived from 4T1 cells expressing PalmReNL (Supplementary Fig. 1k)  
115 demonstrated that exosome fractions preferentially express CD63, TSG101, and Alix,  
116 whereas cell lysates and MV-enriched fractions preferentially express Flotillin-1 as we  
117 previously reported<sup>19</sup>. Importantly, WB analysis of EVs collected from the parental 4T1  
118 cell line demonstrated that the reporter protein (PalmReNL) does not interfere with the  
119 expression of any of the EVs marker proteins tested (Supplementary Fig. 1j). All fractions  
120 of EVs containing PalmReNL (cell lysates, MVs, and exosomes) expressed tdTomato.  
121 The labeling efficiency was also confirmed by fluorescence microscopy, demonstrating  
122 that the total fluorescence intensities were higher in exosomes, but punctate signal  
123 intensity was higher for individual MVs (Fig. 1e-g). To further assess the efficiency of EV  
124 labeling with PalmReNL, we analyzed individual PalmReNL-exosomes and -MV by flow  
125 cytometry (Fig. 1j, k). Firstly, all the isolated PalmReNL-EVs were stained with CellTrace  
126 Violet (CTV) as an alternative to CFSE, an amine-reactive dye previously used for  
127 nanoFACS<sup>21</sup>. The PalmReNL signal was detected on the tdTomato channel, and the  
128 percentage of positive labeling was 1.2% for exosomes and 6.3% for MVs stained with  
129 CTV (Fig. 1l). The median fluorescence intensity (MFI) of PalmReNL in individual MVs

130 was 1.27-fold higher than that of exosomes (Fig. 1m). As we previously reported,  
131 phosphatidylserine (PS) externalization in exosomes and MVs was examined using  
132 Annexin V staining<sup>18</sup>. The fluorescence signals in individual exosomes were significantly  
133 higher than the signals in individual MVs, where 95.4% and 52.9% of PS externalization  
134 was detected in exosomes and MVs stained with CTV, respectively (Fig. 1l). The MFI of  
135 Annexin V in individual MVs was 2.6-fold lower than that of exosomes among the CTV-  
136 stained EVs (Fig. 1m).

137 Furthermore, we found that the release of EVs from 4T1 cells-expressing PalmReNL *in*  
138 *vitro* occurs every 24 h and peaks at 72 h. The bioluminescence signals in both  
139 exosomes- and MVs-PalmReNL correlated with the number of particles present, and  
140 increased steadily over the 72 h period (Supplementary Fig. 2b, c). The reporter 4T1 cells  
141 appear to release ~20-fold more MVs than exosomes as assessed by NTA. The  
142 bioluminescence signals were also correlated with the number of EVs purified from  
143 different EV fractions after density gradient ultracentrifugation (Supplementary Fig. 2d).

144 Measuring the bioluminescence signals in equal numbers of PalmReNL-exosomes and -  
145 MVs ranging from  $2.5 \times 10^6$  to  $1.0 \times 10^7$  using 25  $\mu$ M Fz demonstrated that the  
146 bioluminescence signals in the exosomes ( $1.9 \times 10^5 \pm 1.4 \times 10^4$  RLU;  $p < 0.0001$ ) were 1.7-  
147 fold higher than those of the MVs ( $1.1 \times 10^5 \pm 1.8 \times 10^3$  RLU). A novel Fz analogue, named  
148 fluorofurimazine (FFz), with increased aqueous solubility was recently developed<sup>22</sup>. We  
149 found FFz was 1.4- and 1.5-fold more sensitive (exosomes  $2.6 \times 10^5 \pm 3.9 \times 10^3$  RLU,  
150  $p = 0.0012$ ; MVs  $1.7 \times 10^5 \pm 3 \times 10^3$  RLU,  $p < 0.0001$ ) than Fz (Fig. 1n) with PalmReNL-  
151 exosomes and -MV, respectively. The protein concentrations of  $5.6 \times 10^7$  EV particles  
152 were 45.4  $\mu$ g/mL for exosomes and 23.9  $\mu$ g/mL for MVs. Furthermore, the

153 bioluminescence spectra of PalmReNL-exosomes and -MVs were measured with similar  
 154 emission spectra, peaking at 585 nm (Fig. 1o). Taken together, these results suggest that  
 155 exosomes incorporate PalmReNL more efficiently compared to MVs. However,  
 156 fluorescence signals in individual exosomes are below the detection limit and only  
 157 individual MVs carry fluorescently detectable numbers of PalmReNL molecules due to  
 158 the larger surface areas relative to exosomes and/or symmetrical labeling of MV  
 159 membranes.

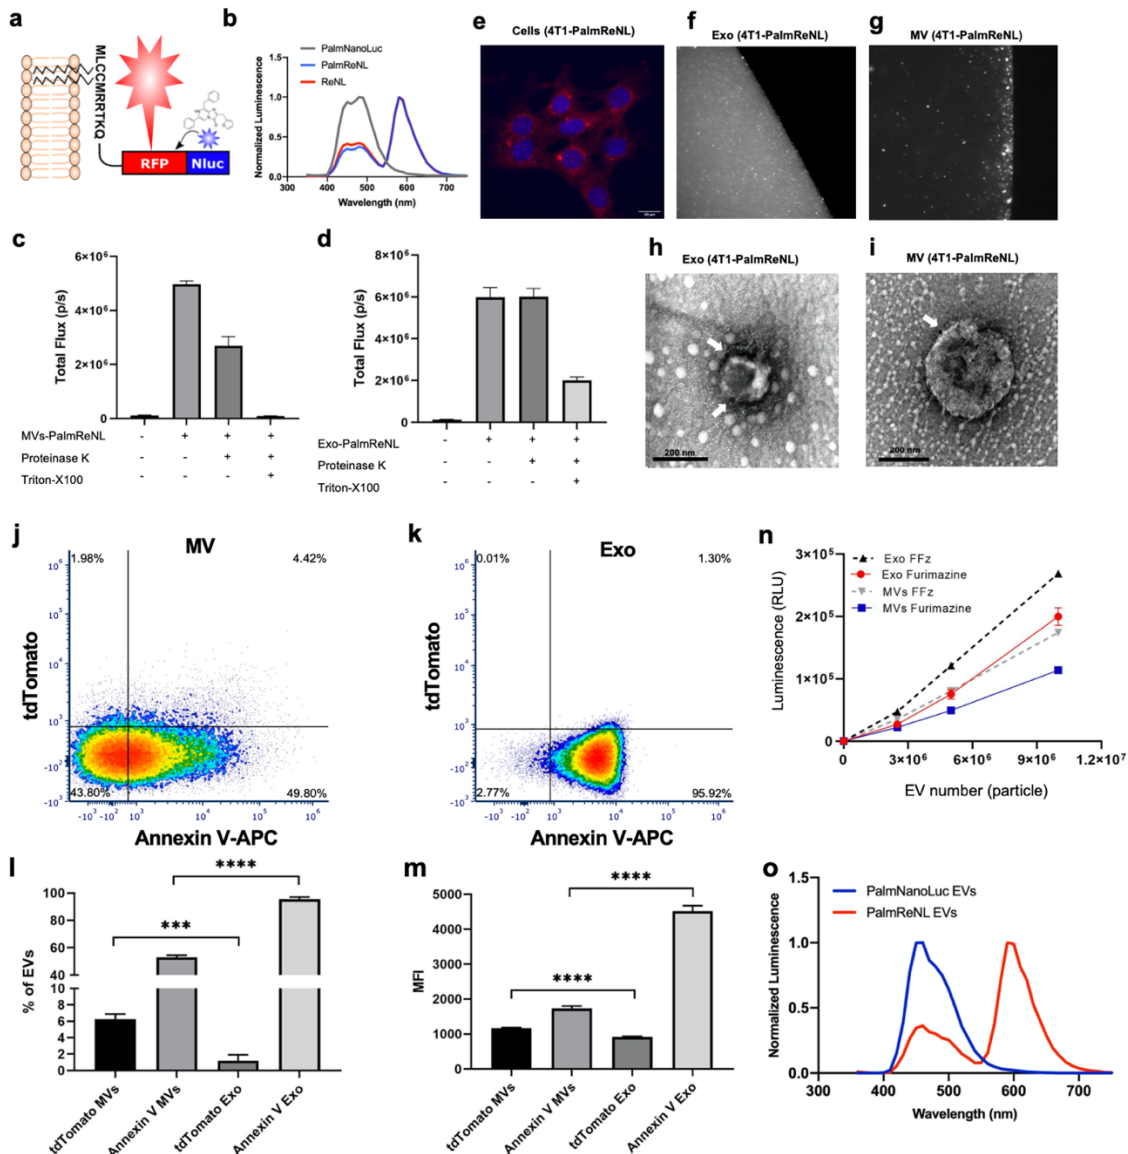

160



**Fig. 1 PalmReNL-based labeling of exosomes and MVs derived from 4T1 cells. a** Schematic diagram of EV membrane labeling with PalmReNL BRET probe. **b** Emission spectra of murine mammary carcinoma 4T1 cells transfected with ReNL, PalmReNL, or PalmNanoLuc. **c, d** Proteinase-K protection assay for PalmReNL-MVs and exosomes. **e** 4T1 cells constitutively expressing PalmReNL. Punctate signals of RFP (red) were merged with nuclei stained with Hoechst 33342. Scale bar, 20  $\mu$ m. **f, g** A droplet of buffer containing isolated PalmReNL-exosomes and -MVs. **h, i** Transmission electron microscopy of 4T1 cell-derived PalmReNL-exosomes or -MVs, immunogold labeled for RFP. Arrows point towards positive RFP signal (dark spots). Scale bars, 200 nm. **j, k** A representative of three independent experiments of Annexin V staining of individual PalmReNL-MVs and -exosomes analyzed by flow cytometry. The tdTomato fluorescence signal represents PalmReNL-EVs. FACS plots were gated for tdTomato<sup>+</sup> and Annexin V<sup>+</sup> EVs among the CTV-stained EVs. **l, m** The percentage and median fluorescence intensity (MFI) of positively labeled CTV-exosomes and -MVs. Error bars, SD (n = 3), \*\*\*, P < 0.001; \*\*\*\*, P < 0.0001. **n** Bioluminescence analysis of PalmReNL-exosomes and MVs using furimazine and fluorofurimazine (FFz). Error bars, SD (n = 5). **o** Emission spectra of the isolated PalmNanoLuc- and PalmReNL-EVs.

161

162 **Rates of endocytosis of tumor cell-derived exosomes and MVs were similar**  
163 **between various recipient cell types.**

164 Uptake of PalmReNL-exosomes and MVs by macrophages (Fig. 2a-c), 4T1 cells (Fig. 2d-  
165 f), lung fibroblasts (Fig. 2g-i), or adipose-derived mesenchymal stromal cells (AMSCs)  
166 were assessed (Fig. 2j-l). Phase contrast and fluorescence microscopy demonstrated that  
167 EV-uptake was time-dependent. In our experimental conditions the 24 h time point  
168 showed the highest fluorescence. Of note, the fluorescence signals of our reporter EVs  
169 decreases over time, which is an advantage compared to the widely used lipophilic  
170 fluorescent dyes such as PKH, DiR, and Dil which can persist in the recipient cells. These  
171 dyes previously showed inaccurate spatiotemporal information on the reporter EVs due  
172 to its inherent stability<sup>15,18</sup>.

173 The bioluminescence signal did not reveal any significant differences between the cell  
174 types in the uptake of the reporter, except at 2 h between RAW 264.7 cells and lung  
175 fibroblasts where the bioluminescence signal of PalmReNL-MVs was significantly higher  
176 ( $3.1 \times 10^8 \pm 2.5 \times 10^7$  and  $2.2 \times 10^8 \pm 7.1 \times 10^6$  p/s, respectively;  $p=0.004$ ). Both cell types  
177 had a significantly lower ( $p<0.05$ ) bioluminescence signal of PalmReNL-MVs at 24 h  
178 (Supplementary Fig. 3a-d). By contrast, the uptake of PalmReNL-exosomes appeared to  
179 remain constant during the 24 h period in all cell types tested. Next, we assessed the  
180 mechanism of cellular uptake of exosomes and MVs. Inhibition of caveolin-dependent  
181 endocytosis, which was inhibited by methyl- $\beta$ -cyclodextrin (M $\beta$ CD; a compound that  
182 sequesters the cholesterol in the cell membrane<sup>23</sup>), significantly decreased the MV-  
183 uptake in all cell types studied (Fig. 2m-p). Interestingly, MV uptake in Raw 264.7 cells  
184 appears to occur by both clathrin-dependent endocytosis inhibited by chlorpromazine<sup>24</sup>  
185 and caveolin-dependent endocytosis (Fig. 2m, q). On the other hand, the uptake of  
186 exosomes in all the cell types tested was independent of both caveolin and clathrin (Fig.  
187 2m-t).

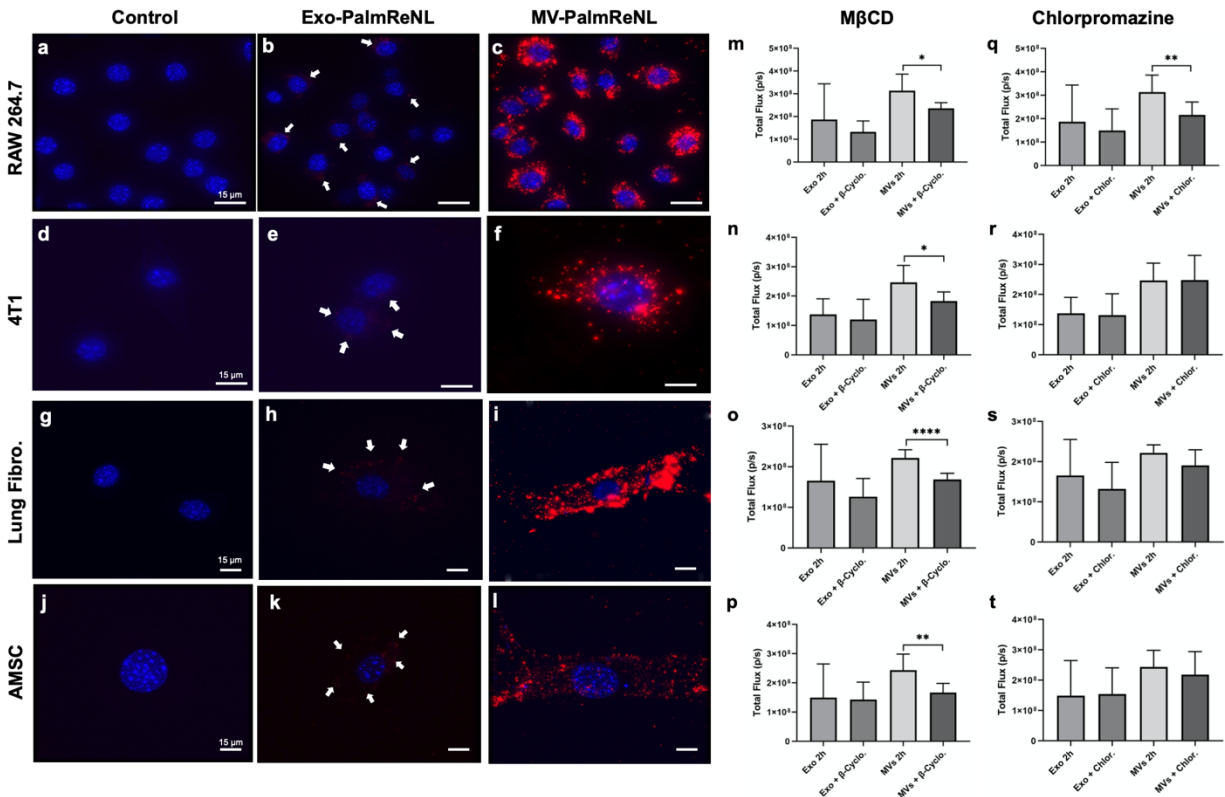

188

**Fig. 2 Similar rates of endocytosis of 4T1 cell-derived exosomes- and MVs-PalmReNL between various recipient cell types *in vitro*.** a-c Macrophages (RAW 264.7). d-f 4T1 cells. g-i primary mouse lung fibroblasts. j-l Adipose-derived mesenchymal stromal cells (AMSCs). Punctate signals of RFP (red) were merged with nuclei stained with Hoechst 33342 (blue). Scale bar, 15  $\mu$ m. Arrows indicate weak RFP signals in PalmReNL-exosomes. m-t, The recipient cells were treated with methyl- $\beta$ -cyclodextrin (M $\beta$ CD; 10 mM) (m-p) or Chlorpromazine (10  $\mu$ g/mL) (q-t). m, q Macrophage RAW 264.7 cells. n, r 4T1 cells. o, s Mouse primary lung fibroblasts. p, t Mouse AMSCs. Error bars, SD (n = 8), \*, P < 0.05; \*\*, P < 0.01; \*\*\*\*, P < 0.0001.

189 Although the bioluminescence signal for PalmReNL-exosomes was higher than that of  
 190 MVs-PalmReNL (see Fig. 1n), detecting exosome uptake by fluorescence microscopy  
 191 was challenging. We hypothesized that our inability to detect the PalmReNL-exosomes  
 192 reflects those reporter exosomes cannot retain the fluorescence signal after being taken  
 193 up by the cells. Rapid diffusion of the PalmReNL into other cellular membrane  
 194 compartments might result in a fast loss of signals. To prove this, we compared the *in*  
 195 *vitro* uptake by RAW 264.7 macrophages or 4T1 cells of exosomes derived from 4T1 cells

196 stably expressing the exosome marker CD63 fused with mScarlet<sup>25</sup> or PalmReNL. CD63-  
197 mScarlet-exosomes showed punctate fluorescence signals in both recipient 4T1 and  
198 RAW 264.7 cells (Fig. 3c, f), demonstrating their cellular uptake and signal retention after  
199 being taken up by cells. On the other hand, PalmReNL-exosomes did not retain the  
200 signals after being taken up by cells and therefore precluded their visualization with the  
201 current sensitivity and resolution of our microscope (Fig. 3b, e). However, exosomes  
202 carrying PalmReNL retained bioluminescence in the recipient cells (see Supplementary  
203 Fig. 3). These results indicate that PalmReNL carried by exosomes might be rapidly  
204 transferred from early endosomes into other membrane compartments for either  
205 degradation or recycling, whereas transferred CD63-mScarlet may be retained in  
206 endosomal membranes in recipient cells as recently reported<sup>17</sup>.

207 To further assess the effect of acidic cellular compartments on PalmReNL-exosomes, we  
208 used Palm-fused Gamillus (acid-tolerant monomeric GFP<sup>26</sup>) for EV labeling and  
209 compared the uptake of exosomes by fluorescence microscopy. At 24 h the exosomes-  
210 PalmGamillus signal was easily detected by fluorescence microscopy compared to the  
211 PalmReNL-exosomes signal which was barely detected (Supplementary Fig. 4b, c).  
212 Moreover, treatment of cells with inhibitors of endosomal acidification, either  
213 Concanamycin A<sup>27</sup> or Chloroquine<sup>28</sup> significantly increased the bioluminescence signal of  
214 PalmReNL-exosomes (Fig. 3g). Since the loss of NanoLuc activity with endosomal  
215 translocation was previously reported<sup>29</sup>, we analyzed the pH sensitivity of EVs-  
216 PalmReNL. The bioluminescence signals of both PalmReNL-exosomes and -MVs  
217 steadily decreased at pH below 6.0 either with or without detergent treatment (Fig. 3h, i),

218 indicating significant signal loss of PalmReNL-based EV reporters in acidic cellular  
219 compartments.

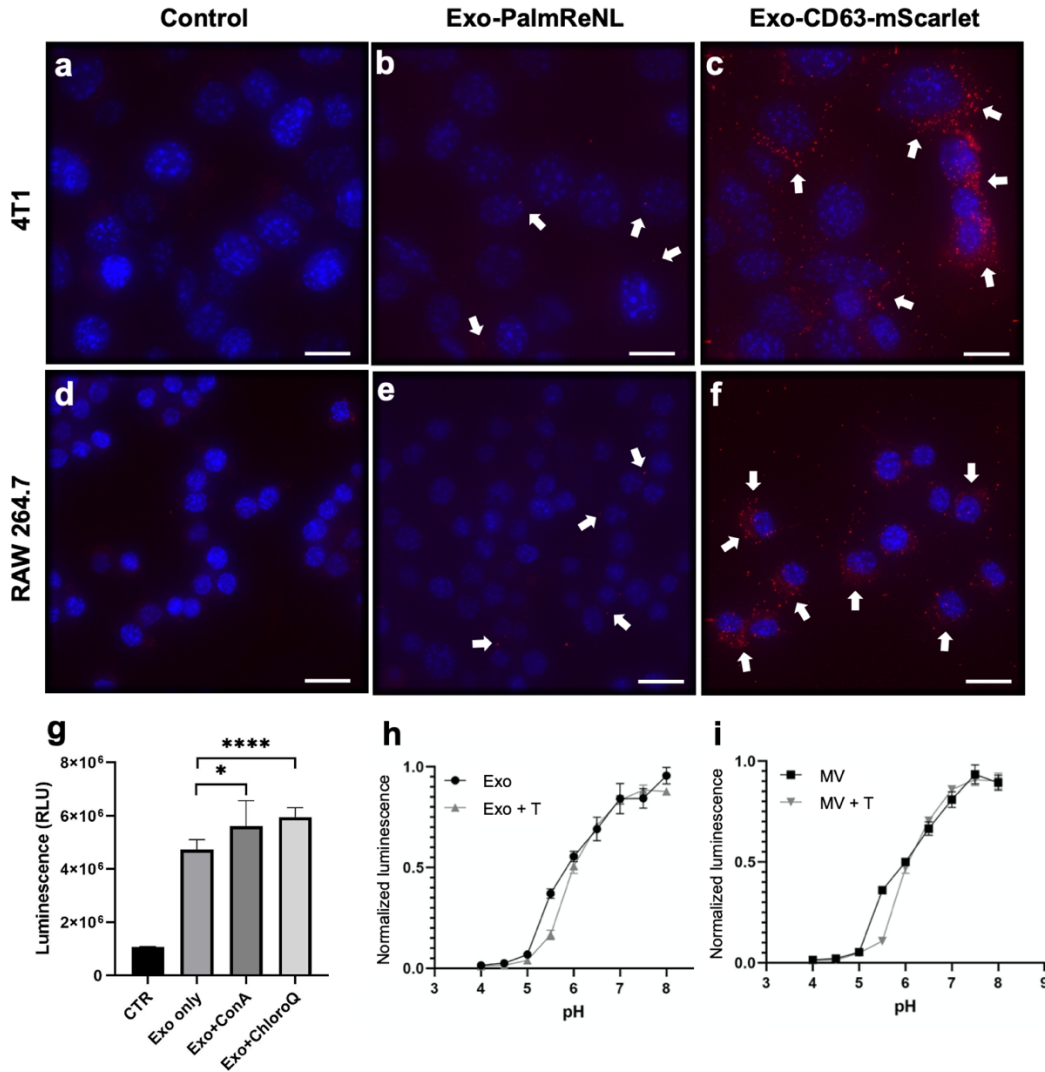

220

**Fig. 3 Rapid processing of PalmReNL carried by exosomes via the endosomal-lysosomal pathway.** Fluorescence microscopy images of 4T1 and RAW 264.7 cells treated for 24 h with PalmReNL- or CD63-mScarlet-exosomes. **a, d** Control 4T1 and RAW 264.7 cells. **b, e** 4T1 and RAW 264.7 cells treated with exosomes-PalmReNL. **c, f** 4T1 and RAW 264.7 cells treated with CD63-mScarlet-exosomes. Punctate fluorescence signals were merged with nuclei stained with Hoechst 33342. Scale bar, 15 μm. White arrows, PalmReNL- or CD63-mScarlet-exosomes. **g** PalmReNL-exosomes taken up by 4T1 cells in the presence of concanamycin-A or Chloroquine showed higher bioluminescence signals compared to control. Error bars, SD (n = 8), \*, P < 0.03, \*\*\*\*, P < 0.0001. **h, i** Conventional pH titration curves of the normalized bioluminescence signals of exosomes- and MVs-PalmReNL. Error bars, SD (n = 5).

221 **Proliferation of various cell types by treatment with EVs *in vitro***

222 To evaluate the physiological significance of cellular EV-uptake we analyzed the  
223 proliferation curves of various cell types (Raw 264.7, 4T1, lung fibroblasts, and AMSCs)  
224 when cultured for a period of 48 h with or without EVs ( $2.5 \times 10^9$ ) derived from 4T1 cells  
225 expressing PalmReNL. Interestingly, only the exosome-enriched fraction increased the  
226 proliferation rate of every one of the cell types tested. By contrast, MVs increased the  
227 proliferation rate only in RAW 264.7 cells (Fig. 4b). Both exosomes and MVs activated  
228 macrophages (clearly evident by the change in morphology of cell spreading and  
229 formation of dendrite-like structures) after 48 h of treatment (compare Fig. 4d, e with Fig.  
230 4c).

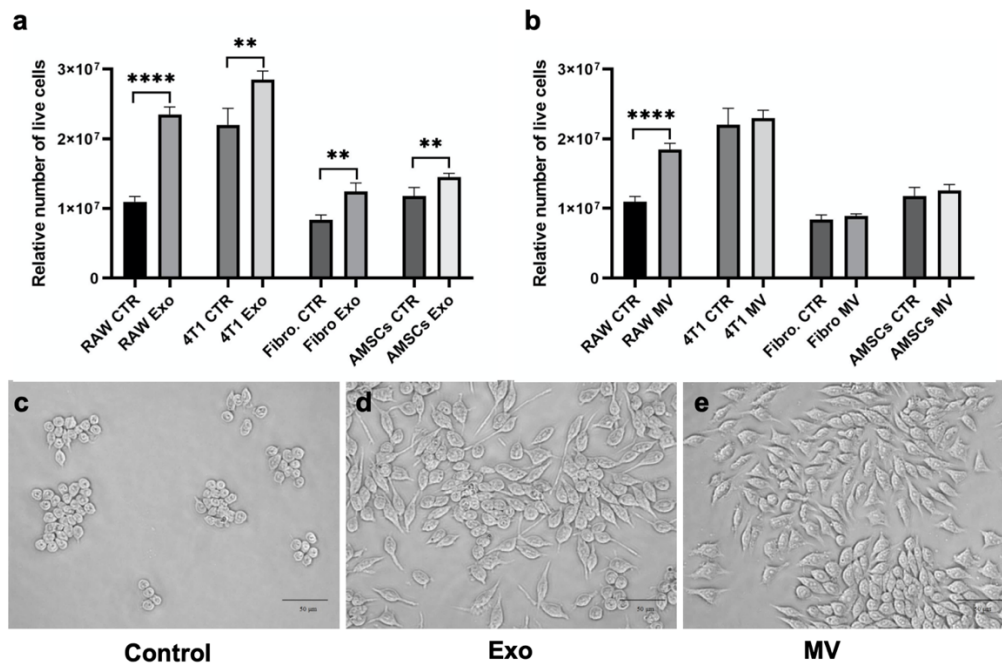

231

**Fig. 4 Proliferation of various cell types by treatment with 4T1 cell-derived EVs *in vitro*.** **a, b** Proliferation curves of various cell types (RAW 264.7 cells, 4T1 cells, lung fibroblasts and AMSCs) when cultured for a period of 48 h without or with EVs-PalmReNL ( $2.5 \times 10^9$ ). Error bars, SD (n = 4), \*\*, P < 0.001; \*\*\*\*, P < 0.0001. **c, d, e** Both exosomes and MVs activated macrophages (clearly evident by the change in morphology) after 48 h of treatment. Scale bar, 50  $\mu$ m.

232 **Exosomes and MVs derived from metastatic mammary carcinoma 4T1 cells**  
233 **showed similar biodistribution and preferentially accumulated in the lung *in vivo*.**

234 To determine the biodistribution of 4T1 cell-derived exosomes and MVs,  $1.0 \times 10^9$   
235 exosomes or MVs carrying PalmReNL were administered intravenously (i.v.) in healthy  
236 female BALB/c mice. Both reporter exosomes and MVs distributed throughout the body  
237 within five min despite the difference of size and membrane composition between these  
238 EV classes. The reporter exosomes displayed significantly higher bioluminescence  
239 signals ( $1.8 \times 10^6 \pm 8.8 \times 10^5$  p/s; n=18;  $p=0.0016$ ; Fig. 5b, c, f) following i.v. injections,  
240 compared to the reporter MVs i.v. injected ( $1 \times 10^6 \pm 6.2 \times 10^5$  p/s; n=15; Fig. 5d, e, f).  
241 The *ex vivo* signal, particularly in the lungs, was higher for the reporter exosomes ( $3.0 \times$   
242  $10^7 \pm 2.4 \times 10^7$  p/s; n=3;  $p=0.02$ ; Fig. 5g), when compared to signal in lungs from control  
243 mice ( $3.9 \times 10^4 \pm 3.3 \times 10^4$  p/s; n=5; Fig. 5g). However, there was no significant difference  
244 between the lung *ex vivo* signal for the reporter exosomes compared to that of the MVs  
245 (Fig. 5g). Moreover, there were no significant differences between the bioluminescence  
246 signals of the reporter exosomes and MVs injected i.p. (Fig. 5f).

247 The bioluminescence signals of the PalmReNL-exosomes and -MV were also analyzed  
248 in plasma samples collected at various time points (5 min, 2 h, 6 h, and 24 h) following  
249 retro-orbital (i.v.) or i.p. injections (Fig. 5h and Supplementary Fig. 5). The maximum  
250 bioluminescence signals were observed at 5 min in the i.v. injected reporter exosomes  
251 and MVs. In contrast, it took 2 h to reach the maximum levels of the bioluminescence  
252 signals in the i.p. injected reporter exosomes and MVs (Fig. 5h). The reporter MVs  
253 showed total area under the curve (AUC) for i.v.  $3.2 \times 10^8 \pm 5.7 \times 10^7$  p/s·h; n=15; and for  
254 i.p.  $3.2 \times 10^8 \pm 2.5 \times 10^7$  p/s·h; n=15; Fig. 5i). The reporter exosomes showed significantly

255 higher bioluminescence signals compared to the reporter MVs (total AUC for i.v.  $9.6 \times 10^8$   
256  $\pm 9.8 \times 10^7$  p/s·h; n=15;  $p=0.0006$ ; for i.p.  $7.2 \times 10^8 \pm 6.0 \times 10^7$  p/s·h; n=15;  $p=0.0005$ ; Fig.  
257 5i).

258 To determine if the bioluminescence signals of reporter MVs could be enhanced by  
259 improved substrate availability *in vivo*<sup>22</sup>, in the next set of experiments we tested a Fz  
260 analog FFz. PalmReNL-MVs were i.p. injected as injection routes (i.v. vs i.p.) did not  
261 affect the AUC of PalmReNL-MVs (Fig. 5i). Because of its improved solubility, a higher  
262 dosage of FFz can be applicable, but here we injected the same dosage of 0.25 mg/kg  
263 as Fz to compare their sensitivities. PalmReNL-MVs administered i.p. exhibited 6-fold  
264 more bioluminescence when FFz was i.v. injected as the substrate ( $2.5 \times 10^6 \pm 3.4 \times 10^5$   
265 p/s; n=5;  $p=0.0005$ ) as compared to Fz ( $4.2 \times 10^5 \pm 1.1 \times 10^5$  p/s; n=5; Supplementary  
266 Fig. 6).

267

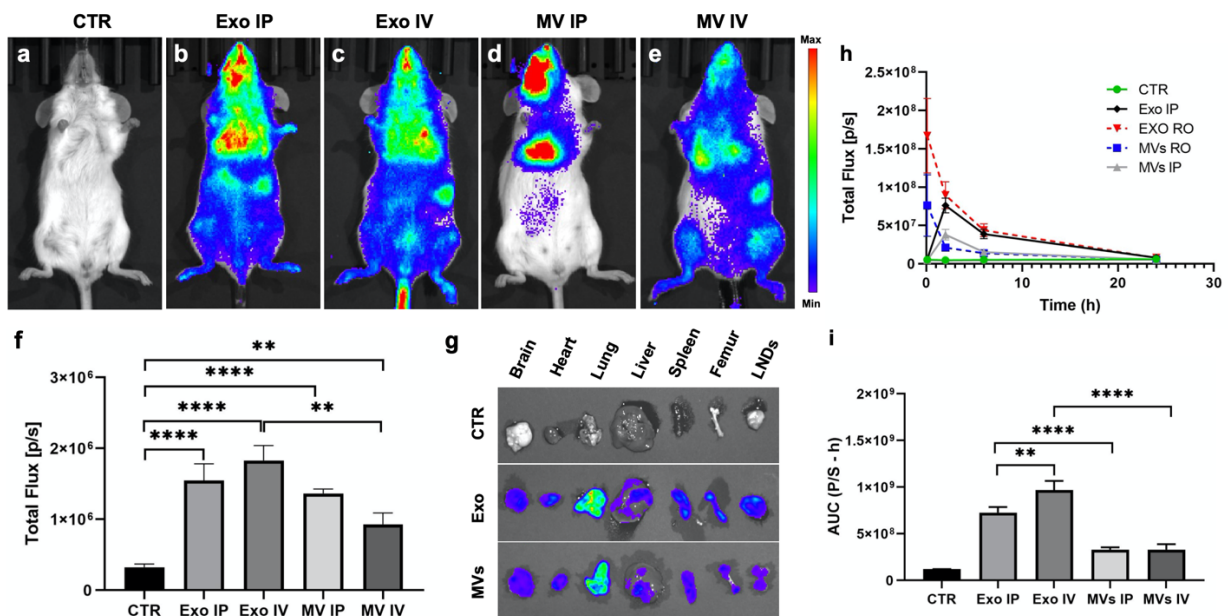

268



**Fig. 5 Similar biodistribution and organotropism of exosomes and MVs derived from metastatic mammary carcinoma 4T1 cells.** **a-e** 4T1 cell-derived exosomes and MVs,  $1.0 \times 10^9$  PalmReNL-exosomes or -MVs were administered intravenously (i.v.) or intraperitoneally (i.p.) in healthy BALB/c mice. Furimazine was i.v. injected. **f** Analysis of bioluminescence signals in (a-e). There were no significant differences between the bioluminescence signals of PalmReNL-exosomes and -MVs injected i.p. **g** The *ex vivo* signal, particularly in the lungs, was higher for the reporter exosomes when compared to the signal in lungs from control mice. Error bars, SEM (CTR n =10; exosome i.p. n=3; exosome i.v. n=18; MV i.p. n=3; MV i.v. n=15), \*\*, P < 0.01; \*\*\*\*, P < 0.0001. **h** The plasma samples were collected from the animals after EV isolation. The reporter exosomes displayed significantly higher bioluminescence signals compared to the reporter MVs in the plasma samples. The maximum bioluminescence signals were observed at 5 min in the i.v. injected reporter exosomes and MVs. In contrast, it took 2 h to reach the maximum levels of the bioluminescence signals in the i.p. injected reporter exosomes and MVs. Error bars, SD (n = 3). **i** AUC analysis of the bioluminescence signals in the plasma samples over 24 h post-EV injection. Error bars, SD (n = 15), \*\*, P < 0.01; \*\*\*\*, P < 0.0001.

269

270 **Bioluminescence signals in tumor-bearing mice decreased as the tumors grow.**

271 Despite their distinct sizes and cellular origins, the reporter exosomes and MVs derived  
272 from 4T1 cells behaved similarly *in vitro* and *in vivo* under the constraints of our  
273 experimental approach. However, the PalmReNL-MVs produced and retained  
274 significantly higher fluorescence signals compared to the PalmReNL-exosomes, in  
275 extracellular spaces as well as the intracellular environment after being taken up by cells  
276 likely due to their larger size. Tumor cell-derived MVs have been shown to play a key role  
277 in cancer progression by transferring oncogenic receptors to neighboring cells in the  
278 tumor microenvironment<sup>30-32</sup>. However, how tumor cell-derived MVs distribute throughout  
279 the body and contribute to metastasis formation has not been determined. In an effort to  
280 start deciphering the roles that MVs play under both physiological and pathological  
281 conditions, in the next sets of *in vivo* experiments we followed the behavior of reporter  
282 MVs in mice with or without mammary tumors.

283 Interestingly, the bioluminescence signals of PalmReNL-MVs were significantly lower in  
284 tumor-bearing mice compared to the healthy mice (Supplementary Fig. 7). Two weeks  
285 after tumor cell injection, the bioluminescence signal in PalmReNL-MVs injected i.p. was  
286 2.2-fold lower [ $8.7 \times 10^5 \pm 1.3 \times 10^5$  p/s; n=4;  $p=0.002$  (Supplementary Fig. 7b,d)],  
287 compared to control [ $1.9 \times 10^6 \pm 1.6 \times 10^5$  p/s; n=4 (Supplementary Fig. 7a,d)].

288

289 **Early induction of metastasis by multiple doses of tumor cell-derived MVs in**  
290 **mammary tumor-bearing mice.**

291 The decrease of the bioluminescence signal of the reporter MVs in the presence of tumors  
292 combined with the results of other *in vivo* and *in vitro* experiments suggest the  
293 involvement of EV-mediated signaling pathways in the modulation of mammary tumor  
294 progression, most probably at the level of the lungs. Therefore, in the next set of  
295 experiments we investigated whether or not MVs play any role in the induction of  
296 metastatic lesions.

297 One week after orthotopic injection of reporter 4T1-BGL cells constitutively expressing  
298 fLuc and eGFP, 90% of immunocompetent BALB/c mice developed detectable tumors in  
299 the mammary fat pad as revealed by bioluminescence imaging (BLI) (n=40). By two  
300 weeks after injection of the reporter 4T1 cells, the tumors were still growing steadily.  
301 Metastasis was evident in 50% of females that received multiple injections of MVs three  
302 weeks after the tumor formation, but only when the MVs were purified from 4T1 cells (Fig.  
303 6i). The metastatic foci were detected *ex vivo* using D-luciferin as the substrate (Fig. 6j;  
304 arrow points to the fLuc bioluminescence signal detecting metastasis in the lung of a  
305 mouse treated with 4T1 cell-derived MVs).

306 In addition, the metastatic foci were detected by histological analysis of lung sections  
 307 following H&E staining (Fig. 6a-f). EGFP-positive cells were observed only in areas near  
 308 the metastatic foci (Fig. 6g, h). Other histological findings included: hemorrhagic lungs  
 309 were more apparent in mice treated with MVs purified from fibroblasts (71%) and 4T1  
 310 cells (75%) compared to control tumor-bearing mice; the appearance of ectopic lymphoid  
 311 structures (ELS) or lymphoid cell aggregates (LCA)<sup>33</sup> were predominantly present in lungs  
 312 of mice treated with MVs isolated from 4T1 cells expressing PalmReNL (87.5%; Fig. 6i).  
 313 No other significant pulmonary lesions other than intravascular evidence of systemic  
 314 inflammation were observed.

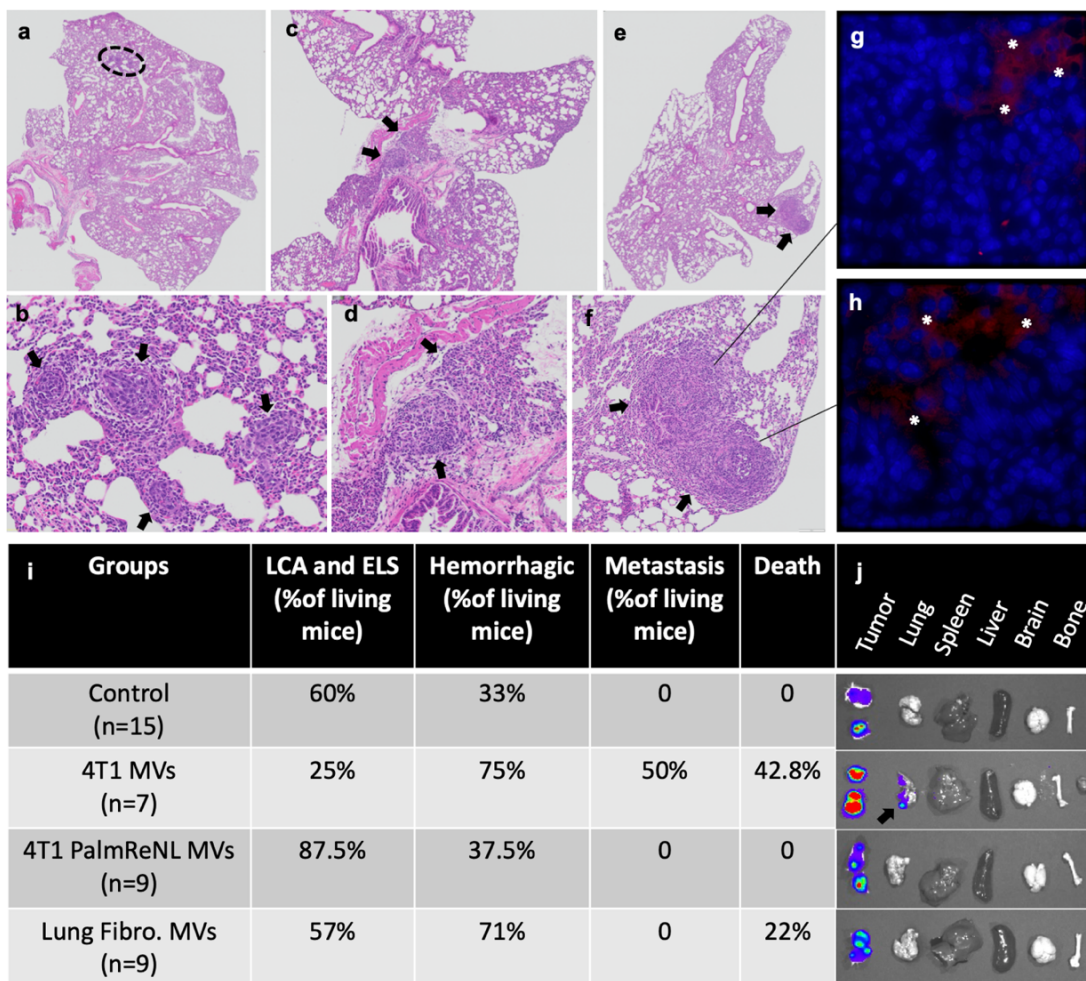

315

**Fig. 6 Promotion of early metastasis by multiple doses of tumor cell-derived MVs in mammary tumor-bearing mice.** a-f, H&E of mouse lung tissues depicting the metastatic foci from two mice treated with 4T1 cell-derived MVs. The images in (a, c, e) are enlarged in (b, d, f). Black arrows indicate metastatic foci. g, h GFP-positive cells (stars) from the primary mammary tumors were observed only in areas near the metastatic foci. i The table depicts other findings including: hemorrhagic lungs, ectopic lymphoid structures (ELS) or lymphoid cell aggregates (LCA), and death. j In *ex vivo* BLI data, an arrow points to metastatic foci of 4T1-BGL cells detected in the lung using D-luciferin.

316

317 The appearance of ELS and LCA structures within the lung suggested a strong  
318 inflammatory response due to the administration of PalmReNL-MVs. We confirmed this  
319 observation through performing immunohistochemistry of lung slides for the localization  
320 of F4/80 positive cells to detect foci of inflammation and particularly cells of the  
321 mononuclear phagocyte lineage<sup>34</sup>. As expected, cells positive for the F4/80 antigen were  
322 primarily associated with the lungs of mice treated with MVs derived from 4T1 cells  
323 expressing PalmReNL, localizing primarily to the bronchiolar epithelium and the  
324 pulmonary interstitium (Fig. 7e). Intriguingly, lungs treated with 4T1 cell-derived MVs  
325 demonstrated the most aggressive metastatic phenotype, while the F4/80 antigen did not  
326 show a remarkable immune response.

327 This MV-mediated promotion of metastasis suggests that 4T1 cell-derived MVs may  
328 modify the tissue microenvironment within the lung in a way that potentiates survival of  
329 metastatic cells. Previous reports showed that EVs are released during stress and can  
330 ultimately metabolically reprogram adjacent cells, promoting survival, invasion, and  
331 metastasis<sup>35,36</sup>. We hypothesized that MVs may be potentiating the survival of cancer  
332 cells within the lung through a similar mechanism. To assess the metabolic health within  
333 the lung of MV-treated mice, we performed immunohistochemistry of the lung slides for

334 the localization of MAP1LC3B (LC3), a key autophagy player that is often upregulated to  
335 promote cancer cell survival in the presence of metabolic stress<sup>37</sup>. Remarkably, the  
336 expression of the LC3 was upregulated in the lung tissue of mice that developed early  
337 metastasis following multiple injections of MVs purified from unmodified 4T1 cells (Fig.  
338 7h).

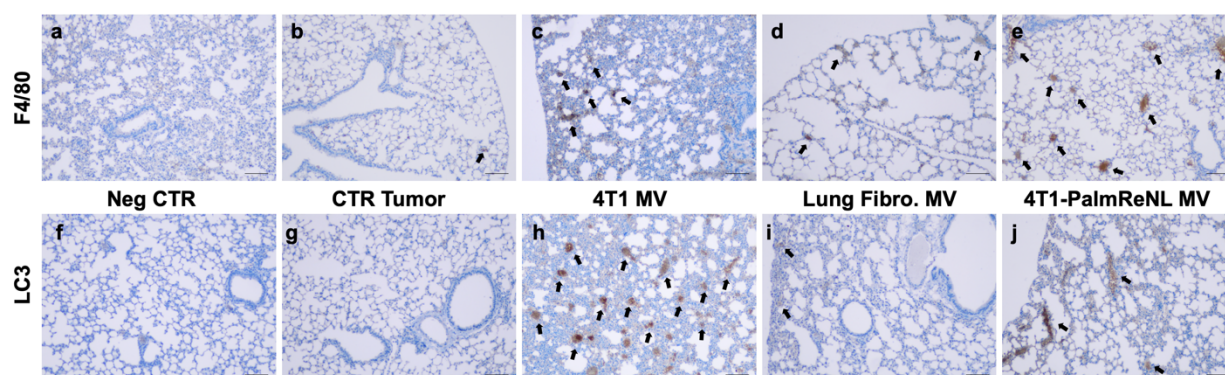

339

**Fig. 7 Immunohistochemistry detection of inflammatory foci and the LC3B protein expression.** a-e Tissue sections of lungs from the different experimental groups stained with anti-F4/80 antibodies. f-j Tissue sections of lungs stained with anti-LC3B antibodies. Scale bars, 100  $\mu$ m. Black arrows indicate F4/80 or LC3 positive regions.

340

### 341 **Autophagy knockout cell lines exhibited increased EV release.**

342 Because metabolic stress promotes EV release, we investigated the possibility that it may  
343 affect MV uptake and release. We tested this within U2OS cells, a well-characterized  
344 autophagy model cell line<sup>38</sup>, due to the stark LC3 upregulation seen in our lung metastasis  
345 models. Unfortunately, traditional tools used to induce metabolic stress, such as  
346 mitochondrial uncouplers or amino acid starvation, result in cell death within 24 hrs and  
347 we were unable to accumulate sufficient MVs within the conditioned media at this  
348 timepoint. Instead, we characterized the uptake and release of EVs within three different

349 cell lines lacking autophagy-related genes (Atg2A/B, Atg5, and Atg9A; Supplementary  
350 Fig. 8), which are essential for the induction of LC3-dependent autophagy<sup>39,40</sup>. Cellular  
351 uptake of PalmReNL-EVs was characterized by assessing tdTomato fluorescence and  
352 measuring bioluminescence. Interestingly, autophagy KO cell lines had opposing effects  
353 on the uptake and release of EVs. Atg2A/B, Atg5, and Atg9A KO had reduced uptake of  
354 MVs derived from PalmReNL-4T1 cells at 24 h in U2OS cells as assessed by flow  
355 cytometry (Fig. 8d and Supplementary Fig. 9), while bioluminescence signals exhibited  
356 reliable results only at 2 h, possibly due to acid sensitivity of PalmReNL (Fig. 8g). The  
357 uptake of exosomes was reduced mainly in Atg2A/B and Atg5 KO cell lines (Fig. 8b). On  
358 the other hand, the release of MVs increased significantly in all the autophagy KO cell  
359 lines (Fig. 8j). The release of exosomes increased at the 72 h time point in the Atg2 KO  
360 cell line only (Fig. 8i).

361

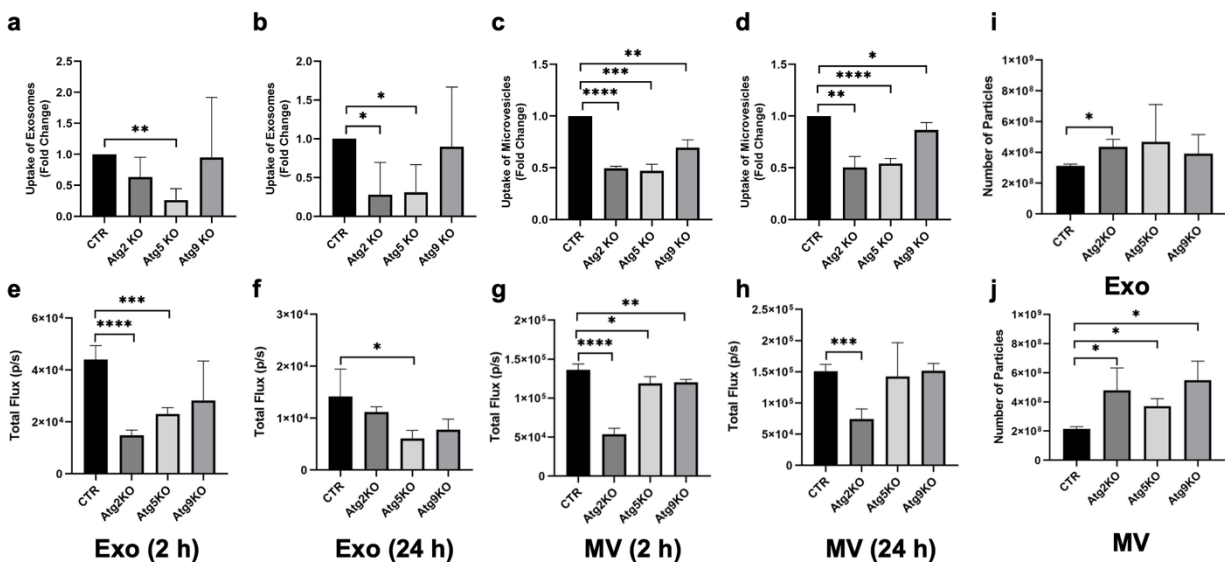

362

**Fig. 8 Decreased EV uptake and increased EV release by blocking autophagy *in vitro*.** Uptake of PalmReNL-exosomes or -MVs in control and autophagy knockout (KO) cell lines, analyzed by flow cytometry and measuring bioluminescence. **a-d** Flow cytometric analysis of cellular uptake of PalmReNL-EVs (tdTomato<sup>+</sup>) in U2OS Atg KO cells relative to control cells. The fold change of EV uptake was calculated using tdTomato fluorescence signals in KO cells compared to the control (CTR). Error bars, SD (n = 3). **e-h** Uptake of PalmReNL-EVs determined by measuring bioluminescence signals. Error bars, SD (n = 4). **i** The release of exosomes assessed by NTA increased at the 72 h time point in the Atg2-KO cell line only. **j** The release of MVs increased significantly in all the autophagy KO cell lines. Error bars, SD (n = 3), \*, P < 0.05; \*\*, P < 0.01; \*\*\*, P < 0.001; \*\*\*\*, P < 0.0001.

363

## 364 Discussion

365 Our BRET-based EV reporter presents a new tool for understanding the roles played by  
366 the distinct EV classes under physiological and pathological conditions. Using a novel  
367 PalmReNL EV probe, we visualized two major classes of EVs, exosomes and MVs, *in*  
368 *vitro* and *in vivo* under the constraints of current technologies for isolation and  
369 characterization of EVs. Our BRET-based EV reporter presents as a new tool for  
370 understanding the roles played by the distinct EV subtypes under physiological and  
371 pathological conditions. In addition to allowing us to determine with high sensitivity the *in*  
372 *vivo* biodistribution of exosomes and MVs, this EV reporter allowed us to decipher the  
373 possible roles of mammary tumor-derived MVs in mediating metastasis to the lungs.  
374 Although EV research remains restricted by current experimental limitations in separation  
375 of EV classes, the size and molecular markers of the EV subtypes in this study support  
376 the successful enrichment of exosomes and MVs in our experimental procedures<sup>18,19</sup>.  
377 The addition of PalmReNL into the EV membrane did not appear to impair the biological  
378 functions of both exosomes and MVs, as demonstrated *in vitro* with the uptake  
379 experiments using various cell lines, and *in vivo* biodistribution studies in mice. Of note,

380 PalmReNL-labeled MVs induced inflammatory responses in the lungs of the mammary  
381 tumor-bearing immunocompetent mice. Technical limitations with the detection of cellular  
382 uptake of PalmReNL-labeled exosomes gave the false impression of less uptake  
383 compared to MVs. However, we demonstrated the lack of sufficient sensitivity for the  
384 detection of fluorescence signals of PalmReNL in the recipient cells when tracking  
385 exosomes carrying CD63-mScarlet (Fig. 3c, f). Moreover, our analysis of single EVs by  
386 flow cytometry revealed that the fluorescence signals in PalmReNL-labeled exosomes  
387 were lower than those of PalmReNL-labeled MVs, possibly attributable to their size  
388 differences and/or symmetrical labeling of MV membranes. However, an equal number  
389 of exosomes showed higher bioluminescence signals than MVs. This result may indicate  
390 that PalmReNL can label more exosomes, while individual exosomes carry probe  
391 molecules not detectable by flow cytometry due to the detection limit. Therefore, analysis  
392 of bioluminescence signals may more appropriately reflect EV uptake in recipient cells.

393 We concluded that the Palm-based fluorescent EV probe is not ideal for tracking the fate  
394 of small EVs (i.e., exosomes) in recipient cells. Rapid diffusion of PalmReNL in  
395 endosomal network likely occurs after the cellular uptake of the reporter EVs, and the  
396 level of fluorescence signals goes below background. We demonstrated that the EV  
397 reporter may be processed through the endosomal-lysosomal pathway by using an acid-  
398 insensitive reporter. PalmGamillus-exosomes retained the fluorescence signals in the  
399 recipient cells compared to the PalmReNL-exosomes. Moreover, neutralizing the  
400 endosomal pH increased the bioluminescence signal intensity of PalmReNL-exosomes.

401 Recently, the heterogeneity of EVs was well-documented<sup>41</sup>. Therefore, it was not  
402 surprising that we found differences between the proliferation effects of exosomes and



403 MVs. The signals of EVs differed most likely because of their various surface receptors  
404 and cargo. Additionally, recipient cells may have different activities of macropinocytosis  
405 and multiple modes of receptor-mediated endocytosis<sup>42,43</sup>. Interestingly, unlike other cell  
406 types tested, macrophage RAW 264.7 cells took up PalmReNL-MVs via clathrin- and  
407 caveolin-dependent pathways (Fig. 2m, q). In addition to phagocytic and macropinocytic  
408 EV uptake, this result corroborates findings that tumor cell-derived EVs are taken up  
409 efficiently by macrophages *in vivo*<sup>44,45</sup>.

410 In mice, the reporter-tagged exosomes and MVs showed similar *in vivo* biodistribution  
411 with respect to their blood circulation and organotropism, primarily towards the lungs. The  
412 analysis of the blood plasma also demonstrated that both types of EVs are quickly taken  
413 up and by 6 h after injection, their blood levels had decreased by half. Interestingly, the  
414 circulation time of the reporter MVs becomes shorter as tumors grow, possibly reflecting  
415 the involvement of immune responses<sup>44,46</sup> as well as regulation orchestrated by the tumor  
416 and the establishment of premetastatic niches<sup>45,47,48</sup>. A study has described how MVs  
417 from metastatic melanoma cells enhance lung colonization of less aggressive, non-  
418 metastatic melanoma cells<sup>49</sup>. However, further work on MVs has mainly highlighted the  
419 ability of MVs to support primary tumor growth and survival<sup>30,31,35</sup>. The early appearance  
420 of metastatic foci observed in the present studies following multiple MV injections  
421 document potent far-reaching effects mediated by tumor cell-derived MVs and support  
422 their future potential as theranostic agents<sup>11,50</sup>. Our *in vitro* assays demonstrated that EVs  
423 can trigger biological responses in lung fibroblasts, AMSCs, macrophages, as well as in  
424 epithelial cells. Any one of these cells, if not all, could be involved in the preparation of  
425 the cell niche that favors metastasis to the lungs during repeated MV injections, a

426 hypothesis that awaits confirmation. Importantly, in the present studies, MVs derived from  
427 normal tissues did not appear to contribute to the development of metastatic disease.

428 A better understanding of the EV-mediated systemic cross-talk between tumor cells and  
429 distant cells should aid in developing novel therapeutic approaches. For example, in lung  
430 and liver metastasis, exosomes exert their effect through immune cells and stromal  
431 cells<sup>45,51</sup>; in the bone, they mainly modulate local stromal cells, osteoclasts, and  
432 osteoblasts<sup>52,53</sup>. In liver metastasis of pancreatic cancer, macrophages play an essential  
433 role in receiving and relaying signals from tumor cell-derived exosomes<sup>45</sup>. Based on these  
434 studies, we hypothesized that MVs modulate metastatic behavior by orchestrating  
435 changes in the local tumor microenvironment as well as the systemic activation and  
436 recruitment of inflammatory cells at distant metastatic sites. However, results from our  
437 experiments demonstrated that the inflammatory cells, likely interstitial macrophages,  
438 appear to be more involved in prevention rather than in the promotion of early metastasis  
439 (Fig. 7). It is likely that the MV-mediated potentiation of metastasis is multifactorial. This  
440 is partially confirmed through the positively stained pockets of LC3 found within the lung  
441 tissue, which demonstrate difference in autophagic signaling within the lung. We  
442 hypothesize that tumor-derived MVs are modifying the tissue microenvironment within the  
443 lung through metabolic reprogramming. This alteration can promote proliferation, survival,  
444 and immune evasion of metastatic cancer cells in the regions they accumulate. However,  
445 further studies are required to characterize whether the upregulation of LC3 is a direct or  
446 indirect effect of MV administration. In addition, the influence of autophagy-related gene  
447 knockout on the release and uptake of EVs will need further characterization as well.

448 In summary, our new BRET EV reporter system enabled us to track EVs *in vitro* and *in*  
449 *vivo* with sufficient sensitivity. By combining non-invasive *in vivo* bioluminescence  
450 imaging with molecular and cellular analyses, we deciphered the possible role of MVs  
451 and LC3-associated mechanisms in early metastasis (summarized in Supplementary Fig.  
452 10). Because of the complexity, EV-mediated signaling likely involves multiple pathways  
453 depending on variations of cell types and physiological/pathological conditions.  
454 Therefore, further extensive studies are needed to establish commonalities and functional  
455 differences of the EV classes. The ability to non-invasively image cancer-associated  
456 molecular markers will ultimately permit earlier detection and phenotyping of cancer,  
457 making possible the development of targeted therapies specific for individual patients.

458

## 459 **Methods**

### 460 **Plasmid DNA constructs**

461 All plasmids were constructed using standard PCR cloning protocols. The constructs  
462 were sequenced by GENEWIZ (South Plainfield, NJ) before using them for our  
463 experiments. For stable reporter gene expression, we constructed a Sleeping  
464 Beauty transposon<sup>54</sup>, in which the reporter genes were under control of the CAG  
465 promoter, by subcloning it into the multiple cloning site of the pKT2/CAGXSP vector<sup>19</sup>  
466 through recombination cloning (In-Fusion HD Cloning Kit, Clontech). For the EV reporter,  
467 a palmitoylation sequence (MLCCMRRTKQ) of GAP-43<sup>15,55</sup> was genetically fused to the  
468 NH<sub>2</sub> terminus of NanoLuc<sup>56</sup> (PalmNLuc), Red-eNanoLantern (ReNL<sup>16</sup>; Addgene plasmid  
469 #89536, gift from Takeharu Nagai), and Gamillus<sup>26</sup> for EV membrane anchoring by PCR  
470 as reported previously. PalmNanoLuc and PalmReNL were amplified by PCR using

471 (forward) 5' -  
472 tgggtggaattctgcagatagccgccaccATGCTGTGCTGTATGAGAAGAACCAAACAGGTCTTC  
473 ACACTCGAAGATTTTCGTTGGGGAC and (reverse) 5' -  
474 cgccactgtgctggatTTACGCCAGAATGCGTTCGCAC, and (forward) 5' -  
475 tgggtggaattctgcagatagccgccaccATGCTGTGCTGTATGAGAAGAACCAAACAGGTGAGC  
476 AAGGGCGAGGAGGTC and (reverse) 5' -  
477 cgccactgtgctggatTTACGCCAGAATGCGTTCGCAC, respectively. Human CD63  
478 (Addgene plasmid #62964, gift from Paul Luzio) and mScarlet<sup>25</sup> (Addgene plasmid  
479 #85042, gift from Dorus Gadella) were amplified using (forward) 5' -  
480 tgggaattctgcagatagccgccaccATGGCGGTGGAAGGAGGAATGAAATG  
481 and (reverse) 5' -  
482 ccaccgctacctccacctcctagatctccCATCACCTCGTAGCCACTTCTGATACTCTTC, and  
483 (forward) 5' -tggaggtagcgggtggaggtggaagccaggatccgATGGTGAGCAAGGGCGAGGC  
484 and (reverse) 5' -gccactgtgctggatTTACTTGTACAGCTCGTCCATGCCG, followed by  
485 combining these amplicons to generate CD63-mScarlet by overlap extension PCR. The  
486 sequence of Gamillus was synthesized as gBlocks (IDT) and a palmitoylation sequence  
487 was fused by PCR using (forward) 5' -  
488 tgggtggaattctgcagatagccgccaccATGCTGTGCTGTATGAGAAGAACCAAAC and (reverse)  
489 5' -cgccactgtgctggatTTACTTGTACAGCTCGTCCATGCCG.

490

## 491 **Cell culture**

492 The labeling efficiency of the palmitoylated reporter was assessed in isolated fractions of  
493 exosomes and MVs from PalmReNL- or PalmNanoLuc-expressing 4T1 cells. The murine

494 breast cancer 4T1 cells, murine macrophage Raw 264.7 cells, and primary mouse lung  
495 fibroblasts were cultured in DMEM supplemented with GlutaMAX (Gibco), 10% (vol/vol)  
496 FBS, and 1% penicillin/streptomycin. Mouse adipose-derived mesenchymal stromal cells  
497 (AMSCs) were cultured in  $\alpha$ -DMEM supplemented with 15% FBS and 1%  
498 penicillin/streptomycin. Mouse primary lung fibroblasts and AMSCs were isolated as  
499 previously described<sup>57</sup>. Monoclonal human osteosarcoma cell (U2OS 3XFlag-HaloTag-  
500 Atg9A, see below) were cultured in RPMI media (Gibco/ThermoFisher, A4192301)  
501 supplemented with 10% FBS and 1% penicillin/streptomycin. All cell cultures were  
502 incubated at 37°C in a 5% CO<sub>2</sub> atmosphere. Some cultures were treated with either  
503 methyl- $\beta$ -cyclodextrin (M $\beta$ CD; 10 mM), chlorpromazine (10  $\mu$ g/mL)<sup>58</sup>, concanamycin-A  
504 (0.5 nM), or chloroquine (50  $\mu$ M). All reagents were purchased from Sigma.

505

### 506 **Generation of the Atg knockout (KO) cell lines**

507 A endogenously edited monoclonal human osteosarcoma cell line (U2OS 3XFlag-  
508 HaloTag-Atg9A) was used as the parental cell line (D.B. and J.S., manuscript in  
509 preparation) and subsequent knockout (KO) cell lines were generated by first ligating  
510 each genes corresponding sgRNA sequences (Atg2A: CGCTGCCCTTGACAGATCG,  
511 Atg2B: ATGGACTCCGAAAACGGCCA, Atg5: AACTTGTTTCACGCTATATC, Atg9A:  
512 aggatatTCGAGAGAAGAAG, FlagTag: atggactacaaagaccatga) into the pX330-U6-  
513 Chimeric\_BB-CBh-hSpCas9 backbone vector<sup>59</sup> (Addgene plasmid # 42230; gift from  
514 Feng Zhang). These plasmids were co-transfected with GFP (pMAXGFP, Lonza), and  
515 single cells were sorted by FACS into 96-well plates, then screened and characterized by

516 Western blot. In the case of the Atg9A-KO cell line, an additional flagTag sgRNA was  
517 added when the parental cell line was transfected.

518

### 519 **Cell proliferation assays**

520 Cell lines were seeded in 96-well plates at a density of 5,000 cells per well, and 24 h later  
521 treated with  $3.0 \times 10^9$  exosomes or MVs. The viability of the cultures was determined 24  
522 h and 48 h after EV treatments by using the CellTiter-Fluor cell viability assay kit from  
523 Promega (G6080) following manufacturers instructions. The filters in the fluorescence  
524 plate reader were set for AFC (380-400 nm excitation; and 505 nm emission).

525

### 526 **EV Isolation**

527 EV-depleted FBS was prepared by 18-h ultracentrifugation at 100,000 g, 4°C<sup>60</sup>. 4T1,  
528 PalmReNL-4T1, or PalmNanoLuc-4T1 cells were seeded at  $1.5 \times 10^6$  cells per 100-mm  
529 cell culture dish. After 24 h the medium was replaced with EV-depleted medium and the  
530 cells were cultured for an additional 48-72 h. At the end of this culture period, MV- and  
531 exosome-enriched fractions were isolated as described previously<sup>18,19</sup>. Briefly,  
532 conditioned medium was centrifuged at 600 g for 5 min to remove cells and debris. The  
533 supernatant was centrifuged again at 2,000 g for 20 min at room temperature (RT) to  
534 remove apoptotic bodies. More dense MVs were separated from the less dense  
535 exosomes by centrifugation at 20,000 g for 60 min at 4°C, using a refrigerated  
536 microcentrifuge 5424 R (Eppendorf). Supernatants were filtered through 0.2 µm PES  
537 membrane filters (Nalgene, 725-2520) with pressure to remove large vesicles. Exosomes

538 were collected by a size-based EV isolation method with modifications<sup>19,61</sup> using 50-nm  
539 membrane filters (EMD Millipore, VMWP02500 or Whatman, WHA110603) with holders  
540 (EMD Millipore, SX0002500). Briefly, holders with 50-nm membrane filters were  
541 connected to a vacuum manifold (Qiagen), and washed with 5-10 mL of PBS buffer by  
542 applying vacuum. Next, the remaining exosome-enriched EV fraction in the supernatant  
543 were trapped on the membranes. When approximately 200-500  $\mu$ L of sample remained,  
544 the concentrated exosome fraction was carefully collected. All EVs were aliquoted and  
545 stored at -80°C.

546

#### 547 **Nanoparticle tracking analysis (NTA) and Zeta potential (ZP) measurement**

548 EVs (exosomes and MVs) derived from 4T1 cells stably expressing PalmReNL,  
549 PalmNanoLuc, or without transfection were analyzed using the ZetaView Multiple  
550 Parameter Particle Tracking Analyzer (Particle Metrix) following the manufacturer's  
551 instructions. EVs were diluted 100- to 1,000-fold with PBS or deionized water for the  
552 measurement of particle size and concentration. The ZP of EVs was measured after  
553 resuspending the EVs in deionized water to a concentration of  $8.0 \times 10^7$  particles/mL as  
554 previously reported<sup>62</sup>.

555

#### 556 **Isolation of EV fractions by density gradient centrifugation**

557 Conditioned medium from 4T1 PalmReNL cells was collected and centrifuged (600 g for  
558 5 min, followed by another centrifugation at 2,000 g for 20 min). The supernatant was  
559 then loaded on top of a discontinuous iodixanol gradient (OptiPrep; Sigma D1556) of 5%,

560 10%, 20%, 30%, 40% and 50% layers<sup>63</sup>. The gradient was then ultracentrifuged at  
561 100,000 g for 18 h at 4 °C. Six fractions were carefully collected from top to bottom,  
562 washed twice with PBS and pelleted by ultracentrifugation at 100,000 g for 1 h at 4°C.  
563 Efficiency, purity and concentration of the fractions were assessed by NTA and measuring  
564 bioluminescence signals.

565

### 566 **Flow cytometric analysis of surface phosphatidylserine (PS) in exosomes and MVs,** 567 **and cellular uptake of EVs**

568 For the analysis of EV surface PS, 100 µL of exosome- or MV-fractions derived from 4T1  
569 cells expressing PalmReNL were stained with CellTrace Violet (CTV; Thermo Fisher,  
570 C34571), followed by removing free dye with a spin desalting column (BioVision, 6564).  
571 CTV-stained EVs were resuspended to a concentration of  $3.5 \times 10^9$  particles/mL in Hanks  
572 balanced salt solution (HBSS). 10x Annexin V binding buffer (0.1 M HEPES pH 7.4, 1.4  
573 M NaCl, 25 mM CaCl<sub>2</sub>.) was added to the mixture (final concentration 1x), and incubated  
574 with Annexin V-APC (BioLegend; 8 ug/mL) to a final concentration of 0.7 µg/mL for 3 h at  
575 RT. At the end of the incubation period, the EVs were fixed with 2% paraformaldehyde  
576 (PFA, methanol-free, prepared with 1x Annexin V binding buffer; final volume 400 µL) for  
577 20 min at RT. Immediately afterwards, the samples were run in the Cytex Aurora spectral  
578 cytometer in the MSU Flow Cytometry Core Facility. Signal threshold was set using the  
579 CTV signal to trigger off of detector V3 (violet), in order to discern EV signal from  
580 background. Buffer only and buffer with staining reagents were run as assay controls to  
581 reliably assess EV signals.



582 The uptake of PalmReNL-EVs by the Atg KO cell lines was also analyzed by flow  
583 cytometry. Cells were plated in 24-well plates at a density of 50,000 cells/well, 24 h later  
584 the cells were switched to EV-depleted medium, and  $1 \times 10^9$  EVs/well were added. After  
585 24 h, medium was removed and the cells were washed with PBS, trypsinized and  
586 harvested. Immediately, the cells were fixed (4% PFA for 20 min at RT) and analyzed by  
587 flow cytometry for the fluorescence signal of tdTomato compared to unstained-cells  
588 (negative control) or 4T1 cells stably expressing PalmReNL (positive control).

589 Flow cytometry data were analyzed with FCS Express v7 (De Novo Software). Gates  
590 were drawn based on fluorescence minus one (FMO) controls.

591

## 592 **Fluorescence microscopy and Bioluminescence measurements**

593 The uptake of PalmReNL EVs by murine macrophages (RAW 264.7), 4T1 cells, primary  
594 mouse lung fibroblasts, mouse AMSCs, or U2OS-Atg-KO cells was analyzed by  
595 fluorescence microscopy and measuring bioluminescence signals. The cells were plated  
596 in 96- or 24-well plates at a concentration of respectively 20,000 or 50,000 cells/well. 24  
597 h later the cells were switched to EV-depleted medium and the reporter 4T1 cell-derived  
598 PalmReNL-exosomes or -MVs were added at a concentration of  $3.5 \times 10^9$  (for RAW  
599 264.7, 4T1, lung fibroblasts, or AMSCs) or  $1-3 \times 10^9$  (for Atg-KO cell lines) EVs/well. At  
600 least three wells were analyzed for each treatment group (control, exosomes, MVs). The  
601 cultures were allowed to proceed for 24 h. At the end of the incubation period the uptake  
602 of the reporter was analyzed by fluorescence microscopy or measuring bioluminescence  
603 signals after adding furimazine (Fz; 25  $\mu$ M) using a VICTOR Nivo Multimode Plate Reader  
604 or IVIS Lumina (PerkinElmer).

605 Phase contrast and fluorescence images of PalmReNL-4T1 cells, reporter EVs, or cells  
606 that were treated with the reporter EVs were taken using All-in-one Fluorescence  
607 Microscope BZ-X700 (KEYENCE) or DeltaVision Microscope (GE Healthcare Life  
608 Sciences). The cells were stained with 10 µg/mL Hoechst 33342 (H3570, Life  
609 Technologies) before microscopy was performed. All images were further analyzed using  
610 the ImageJ software (imagej.nih.gov).

611

## 612 **Western blotting**

613 Whole cell lysates and equal numbers of EVs ( $3.75 \times 10^8$  EVs) were derived from  
614 unmodified 4T1 and PalmReNL-4T1 cells, and mixed with 4x sample buffer (Bio-Rad)  
615 with  $\beta$ -mercaptoethanol (for detecting TSG101, ALIX, Flotillin-1, and anti-RFP) or without  
616  $\beta$ -mercaptoethanol (for detecting CD63). Proteins were separated on a 4%–20% Mini-  
617 PROTEAN TGX gel (Bio-Rad) and transferred to a polyvinylidene difluoride membrane  
618 (Millipore, IPFL00010). After blocking with 5% ECL Blocking Agent (GE Healthcare,  
619 RPN2125) at RT for 1 h, membranes were probed with primary antibodies overnight at  
620 4°C at dilutions recommended by the suppliers as follows: anti-Alix (Proteintech, 12422),  
621 TSG101 (Proteintech, 14497-1-AP), flotillin-1 (BD, 610820), anti-RFP (Rockland  
622 Immunochemicals, 600-401-379), CD63 (Thermo Fisher Scientific, 10628D, Ts63),  
623 Atg2A (Cell Signaling, 15011), Atg2B (Cell Signaling, 25155), Atg5 (Cell Signaling,  
624 12994), Atg9 (Cell Signaling, 13509), followed by incubation with horseradish peroxidase  
625 HRP conjugated secondary antibodies at RT for 1 hour. The membranes were visualized  
626 with ECL select Western Blotting Detection Reagent (GE Healthcare, RPN2235) on  
627 ChemiDoc MP Imaging System (Bio-Rad).

628

### 629 **Dot blot analysis**

630 Membrane orientation of PalmReNL in EVs was characterized as reported previously<sup>15</sup>.  
631 Both exosomes and MVs carrying PalmReNL ( $3 \times 10^7$  EVs/ $\mu$ L) were 2-fold serially diluted.  
632 Aliquots were incubated in the presence or absence of 1% Triton X-100 for 30 min at 37  
633 °C. After pre-wetting a polyvinylidene difluoride membrane (Millipore, IPFL00010) in  
634 methanol and equilibrating in transfer buffer, 2  $\mu$ L of diluted EVs were dotted onto the  
635 membrane and blocked in 5% non-fat dry milk (RPI, M17200-1000.0) for 1 h at room  
636 temperature. The PalmReNL was detected using anti-RFP (Rockland Immunochemicals,  
637 600-401-379) as described under Western blotting methods.

638

### 639 **Proteinase K protection assay**

640 Exosomes and MVs carrying PalmReNL were split into 3 identical aliquots ( $3 \times 10^7$   
641 EVs/ $\mu$ L). Proteinase digestion was performed with 1 mg/mL proteinase K (Qiagen) in the  
642 presence or absence of 1% Triton X-100 for 30 min at 37 °C as reported previously<sup>64</sup>. At  
643 the end of a digestion period bioluminescence signals were measured after adding Fz (25  
644  $\mu$ M) using IVIS Lumina (PerkinElmer).

645

### 646 **Transmission electron microscopy**

647 The samples were prepared as previously reported<sup>61</sup>, with slight modifications. Isolated  
648 EVs (PalmReNL-exosomes:  $6 \times 10^7$  EVs/ $\mu$ L, PalmReNL-MVs:  $7 \times 10^7$  EVs/ $\mu$ L) were fixed

649 in 1% paraformaldehyde. A formvar-coated gold grid was kept in a saturated water  
650 environment for 24 h, and placed on a 50  $\mu$ L aliquot of EV solution, and allowed to  
651 incubate for 20 min while covered. Next, samples were washed and blocked by placing  
652 each one face down on top of a 100  $\mu$ L droplet of the following solutions: PBS (2x, 3 min),  
653 PBS / 50 mM Glycine (4x, 3 min), PBS / 5% BSA (1x, 10 min). A1:100 dilution of anti-  
654 RFP antibody (Rockland Immunochemicals, 600-401-379) in 5% BSA / PBS was used  
655 for labeling (1 h), followed by six washes in PBS / 0.5% BSA. Samples were incubated in  
656 a 1:50 dilution of donkey anti-rabbit immunogold conjugate (Jackson ImmunoResearch,  
657 711-205-152) in 5% BSA / PBS (20 min) and washed in PBS (6x) and water (6x). The  
658 samples were negative stained with 1% uranyl acetate. Excess uranyl acetate was  
659 removed by contacting the grid edge with filter paper and the grid was air-dried. Samples  
660 were observed using a JEOL 1400 Flash Transmission Electron Microscope equipped  
661 with an integrated Matataki Flash sCMOS bottom-mounted camera. The 1400 Flash  
662 was operated at 100 kV.

663

#### 664 **Bioluminescence pH titrations**

665 Bioluminescence signals in exosomes and MVs ( $3 \times 10^7$  EVs/ $\mu$ L) carrying PalmReNL  
666 were measured at room temperature (25°C) using a VICTOR Nivo Microplate Reader  
667 (PerkinElmer). EVs were incubated in the presence or absence of 1% Triton X-100 for 30  
668 min at 37°C. The solutions consisted of 25 mM pH buffer, 125 mM KCl, 20 mM NaCl, 2  
669 mM CaCl<sub>2</sub>, and 2 mM MgCl<sub>2</sub> as reported<sup>65</sup>. The following buffers were used to adjust pH:  
670 pH 4.0 – 5.0: Acetate Buffer; pH 5.5 – 6.5: MES Buffer; pH 7.0 – 8.0: HEPES Buffer.

671

672 ***In vivo* tumor and metastasis studies**

673 All procedures performed on animals were approved by the Institutional Animal Care and  
674 Use Committee of Michigan State University (East Lansing, MI). All mice were purchased  
675 from Charles River Laboratory. Eight week old female BALB/c mice with or without  
676 mammary tumors were used for the biodistribution studies of 4T1-PalmReNL-EVs ( $1.0 \times$   
677  $10^9$  particles/100  $\mu$ L). For the induction of tumors,  $2.5 \times 10^4$  4T1 cells constitutively  
678 expressing BSD-eGFP and fLuc (BGL) were orthotopically injected into the mammary fat  
679 pads of female mice under anesthesia. For the studies analyzing the development of  
680 metastasis, following tumor induction, MVs ( $3.0 \times 10^9$  particles/100  $\mu$ L) were injected into  
681 mice 3 times per week for 3 weeks (8 treatments in total). 4T1-BGL tumors were imaged  
682 (IVIS Spectrum system, see below) after i.p. injecting D-luciferin (3 mg/mouse in 100  $\mu$ L  
683 PBS). Two weeks after tumor/metastasis induction the mice were imaged with the  
684 fluorofurimazine (FFz<sup>22</sup>) substrate (5  $\mu$ g/mouse in 100  $\mu$ L PBS), and the following day *in*  
685 *vivo* and *ex vivo* fLuc imaging were performed to analyze metastases. Immediately after,  
686 mice were sacrificed, dissected, and tissues were fixed (in neutral buffered formalin) and  
687 processed for histological analysis following paraffin embedding and H&E staining.

688

689 **Lung immunohistochemistry**

690 Immunohistochemistry for detection of the LC3 protein and the macrophage marker F4/80  
691 was carried out using standard protocols. Briefly, unstained sections of lungs or tumors  
692 were deparaffinized and rehydrated, and then incubated in the peroxidase blocking

693 reagent (BioVision cat #K405-50). Antigen retrieval was performed by boiling the sections  
694 in sodium citrate for 20 min. To decrease background staining, the slides were incubated  
695 for 1 h in the mouse on mouse blocking reagent (Vector Labs MKB-2213-1), followed by  
696 overnight incubation with the primary antibodies (LC3B Cell Signaling 3868S rabbit  
697 polyclonal, 1:300; or F4/80 Cell Signaling 70076S rabbit monoclonal, 1:200). Next day,  
698 the slides were washed and incubated with One-Step HRP polymer (BioVision cat #K405-  
699 50) for 30 min at RT. The slides were then washed several times and then incubated with  
700 the DAB chromogen for 10 min at RT, followed by several washing steps and quick  
701 counterstain with Hematoxylin. Slides were then mounted and visualized under the  
702 upright microscope (Nikon).

703

#### 704 **Bioluminescence imaging (BLI)**

705 Bioluminescence analysis of the reporter exosomes and MVs was preceded by treatment  
706 of different concentrations of 4T1-PalmReNL-EVs (MVs and Exosomes) with 25  $\mu$ M Fz  
707 or FFz (Promega). *In vitro* uptake or *in vivo* assays for the biodistribution of the reporter  
708 exosomes and MVs were imaged with IVIS Lumina or IVIS Spectrum systems (Xenogen  
709 product line of PerkinElmer). For *in vitro* assays, Fz was added to cultures of 4T1 cells,  
710 RAW 264.7 cells, lung fibroblasts, AMSCs, or U2OS-Atg-KO cells that were treated with  
711 the reporter exosomes or MVs prior to BLI. For *in vivo* imaging, mice were anesthetized  
712 with isoflurane using a SAS3 Anesthesia System (Summit Anesthesia Support) and an  
713 EVAC 4 waste gas evacuation system (Universal Vaporizer Support). Mice were injected  
714 retroorbitally (RO) or intraperitoneally (IP) with MVs or exosomes ( $1.0 \times 10^9$  particles/100  
715  $\mu$ L) with either single or multiple injections (metastasis studies). Five min after intravenous

716 EV injection, or 2 h after intraperitoneal (IP) EV injection, the mice were injected with  
717 either D-luciferin [150 mg/kg; IP], Fz (0.25 mg/kg; RO), or FFz (0.25 mg/kg; RO), and  
718 emitted photons were captured with IVIS as described previously<sup>66</sup>. Immediately after *in*  
719 *vivo* imaging, the mice were sacrificed and organs were excised. Organs were washed in  
720 PBS, treated with Fz, and imaged with the IVIS system. Bioluminescence signals were  
721 analyzed and quantified using the software program Living Image (PerkinElmer).

722

### 723 **Statistical analyses**

724 All statistical analyses were performed with GraphPad Prism software  
725 (GraphPadSoftware). Screening results were analysed by one-way ANOVA followed by  
726 Tukey's post-hoc test. Student *t* test was performed for all data set and *p* values were  
727 noted. Differences were considered to be statistically significant when the *p* value was  
728 less than 0.05.

729

### 730 **Author contributions**

731 A.A.Z., G.I.P., M.K. conceived and designed the experiments. M.K. supervised the work.  
732 A.A.Z., G.I.P., D.B., B.D., A.M., V.T., L.K.T., M.P.B., A.W. executed the experimental  
733 work. A.A.Z., G.I.P., M.K. carried out the data interpretation and statistical analysis. J.H.,  
734 J.R.W., T.A.K., M.H.B., J.S. provided reagents and technical advice. All authors  
735 contributed to the writing of the manuscript.

736

### 737 **Conflict of interest**

738 The authors declare no conflicts of interest.

739

## 740 **Acknowledgements**

741 We thank Mr. Nazar Filonov (Particle Metrix) for supporting our NTA and zeta potential  
742 measurement; Dr. A. Gilad for generously letting us use the C1000 Touch Thermal Cycler  
743 and ChemiDoc MP Imaging System; Dr. C. Mallett and Mr. J. Hix at the MSU IQ Advanced  
744 Molecular Imaging Facility; Ms. A. Porter at the MSU Investigative HistoPathology  
745 Laboratory; Dr. Loro L. Kujjo for critical reading of the manuscript. This work was funded  
746 by start-up funds from Michigan State University (MK. and JS). The schematic illustrations  
747 were created with Inkscape.

748

## 749 **References**

- 750 1 van Niel, G., D'Angelo, G. & Raposo, G. Shedding light on the cell biology of extracellular  
751 vesicles. *Nat Rev Mol Cell Biol* **19**, 213-228, doi:10.1038/nrm.2017.125 (2018).
- 752 2 Kanada, M., Bachmann, M. H. & Contag, C. H. Signaling by Extracellular Vesicles  
753 Advances Cancer Hallmarks. *Trends Cancer* **2**, 84-94, doi:10.1016/j.trecan.2015.12.005  
754 (2016).
- 755 3 Lai, C. P. *et al.* Dynamic biodistribution of extracellular vesicles in vivo using a  
756 multimodal imaging reporter. *ACS Nano* **8**, 483-494, doi:10.1021/nn404945r (2014).
- 757 4 Pucci, F. *et al.* SCS macrophages suppress melanoma by restricting tumor-derived vesicle-  
758 B cell interactions. *Science* **352**, 242-246, doi:10.1126/science.aaf1328 (2016).
- 759 5 Yong, T. *et al.* Tumor exosome-based nanoparticles are efficient drug carriers for  
760 chemotherapy. *Nat Commun* **10**, 3838, doi:10.1038/s41467-019-11718-4 (2019).



- 761 6 Liang, Q. *et al.* The softness of tumour-cell-derived microparticles regulates their drug-  
762 delivery efficiency. *Nat Biomed Eng* **3**, 729-740, doi:10.1038/s41551-019-0405-4 (2019).
- 763 7 Lenzini, S., Bargi, R., Chung, G. & Shin, J. W. Matrix mechanics and water permeation  
764 regulate extracellular vesicle transport. *Nat Nanotechnol* **15**, 217-223, doi:10.1038/s41565-  
765 020-0636-2 (2020).
- 766 8 Maas, S. L. N., Breakefield, X. O. & Weaver, A. M. Extracellular Vesicles: Unique  
767 Intercellular Delivery Vehicles. *Trends Cell Biol* **27**, 172-188,  
768 doi:10.1016/j.tcb.2016.11.003 (2017).
- 769 9 Jeppesen, D. K. *et al.* Reassessment of Exosome Composition. *Cell* **177**, 428-445 e418,  
770 doi:10.1016/j.cell.2019.02.029 (2019).
- 771 10 Xu, R. *et al.* Extracellular vesicles in cancer - implications for future improvements in  
772 cancer care. *Nat Rev Clin Oncol* **15**, 617-638, doi:10.1038/s41571-018-0036-9 (2018).
- 773 11 Bose, R. J. C. *et al.* Tumor Cell-Derived Extracellular Vesicle-Coated Nanocarriers: An  
774 Efficient Theranostic Platform for the Cancer-Specific Delivery of Anti-miR-21 and  
775 Imaging Agents. *ACS Nano* **12**, 10817-10832, doi:10.1021/acsnano.8b02587 (2018).
- 776 12 Lazaro-Ibanez, E. *et al.* Selection of Fluorescent, Bioluminescent, and Radioactive Tracers  
777 to Accurately Reflect Extracellular Vesicle Biodistribution in Vivo. *ACS Nano* **15**, 3212-  
778 3227, doi:10.1021/acsnano.0c09873 (2021).
- 779 13 Wu, A. Y. *et al.* Multiresolution Imaging Using Bioluminescence Resonance Energy  
780 Transfer Identifies Distinct Biodistribution Profiles of Extracellular Vesicles and  
781 Exomeres with Redirected Tropism. *Adv Sci (Weinh)* **7**, 2001467,  
782 doi:10.1002/advs.202001467 (2020).

- 783 14 Wills, C. A. *et al.* Chemotherapy-Induced Upregulation of Small Extracellular Vesicle-  
784 Associated PTX3 Accelerates Breast Cancer Metastasis. *Cancer Res* **81**, 452-463,  
785 doi:10.1158/0008-5472.CAN-20-1976 (2021).
- 786 15 Lai, C. P. *et al.* Visualization and tracking of tumour extracellular vesicle delivery and  
787 RNA translation using multiplexed reporters. *Nat Commun* **6**, 7029,  
788 doi:10.1038/ncomms8029 (2015).
- 789 16 Suzuki, K. *et al.* Five colour variants of bright luminescent protein for real-time  
790 multicolour bioimaging. *Nat Commun* **7**, 13718, doi:10.1038/ncomms13718 (2016).
- 791 17 Sung, B. H. *et al.* A live cell reporter of exosome secretion and uptake reveals pathfinding  
792 behavior of migrating cells. *Nat Commun* **11**, 2092, doi:10.1038/s41467-020-15747-2  
793 (2020).
- 794 18 Kanada, M. *et al.* Differential fates of biomolecules delivered to target cells via  
795 extracellular vesicles. *Proc Natl Acad Sci U S A* **112**, E1433-1442,  
796 doi:10.1073/pnas.1418401112 (2015).
- 797 19 Kanada, M. *et al.* Microvesicle-mediated delivery of minicircle DNA results in effective  
798 gene-directed enzyme prodrug cancer therapy. *Mol Cancer Ther*, doi:10.1158/1535-  
799 7163.MCT-19-0299 (2019).
- 800 20 Raposo, G. & Stoorvogel, W. Extracellular vesicles: exosomes, microvesicles, and friends.  
801 *J Cell Biol* **200**, 373-383, doi:10.1083/jcb.201211138 (2013).
- 802 21 Morales-Kastresana, A. *et al.* Labeling Extracellular Vesicles for Nanoscale Flow  
803 Cytometry. *Sci Rep* **7**, 1878, doi:10.1038/s41598-017-01731-2 (2017).
- 804 22 Su, Y. *et al.* Novel NanoLuc substrates enable bright two-population bioluminescence  
805 imaging in animals. *Nat Methods* **17**, 852-860, doi:10.1038/s41592-020-0889-6 (2020).

- 806 23 Rothberg, K. G. *et al.* Caveolin, a protein component of caveolae membrane coats. *Cell* **68**,  
807 673-682, doi:10.1016/0092-8674(92)90143-z (1992).
- 808 24 Qian, Z. M., Li, H., Sun, H. & Ho, K. Targeted drug delivery via the transferrin receptor-  
809 mediated endocytosis pathway. *Pharmacol Rev* **54**, 561-587, doi:10.1124/pr.54.4.561  
810 (2002).
- 811 25 Bindels, D. S. *et al.* mScarlet: a bright monomeric red fluorescent protein for cellular  
812 imaging. *Nat Methods* **14**, 53-56, doi:10.1038/nmeth.4074 (2017).
- 813 26 Shinoda, H. *et al.* Acid-Tolerant Monomeric GFP from *Olindias formosa*. *Cell Chem Biol*  
814 **25**, 330-338 e337, doi:10.1016/j.chembiol.2017.12.005 (2018).
- 815 27 Drose, S. & Altendorf, K. Bafilomycins and concanamycins as inhibitors of V-ATPases  
816 and P-ATPases. *J Exp Biol* **200**, 1-8 (1997).
- 817 28 Al-Bari, M. A. A. Targeting endosomal acidification by chloroquine analogs as a  
818 promising strategy for the treatment of emerging viral diseases. *Pharmacol Res Perspect*  
819 **5**, e00293, doi:10.1002/prp2.293 (2017).
- 820 29 Robers, M. B. *et al.* A luminescent assay for real-time measurements of receptor  
821 endocytosis in living cells. *Anal Biochem* **489**, 1-8, doi:10.1016/j.ab.2015.08.005 (2015).
- 822 30 Al-Nedawi, K. *et al.* Intercellular transfer of the oncogenic receptor EGFRvIII by  
823 microvesicles derived from tumour cells. *Nat Cell Biol* **10**, 619-624, doi:10.1038/ncb1725  
824 (2008).
- 825 31 Al-Nedawi, K., Meehan, B., Kerbel, R. S., Allison, A. C. & Rak, J. Endothelial expression  
826 of autocrine VEGF upon the uptake of tumor-derived microvesicles containing oncogenic  
827 EGFR. *Proc Natl Acad Sci U S A* **106**, 3794-3799, doi:10.1073/pnas.0804543106 (2009).

- 828 32 Feng, Q. *et al.* A class of extracellular vesicles from breast cancer cells activates VEGF  
829 receptors and tumour angiogenesis. *Nat Commun* **8**, 14450, doi:10.1038/ncomms14450  
830 (2017).
- 831 33 Colbeck, E. J., Ager, A., Gallimore, A. & Jones, G. W. Tertiary Lymphoid Structures in  
832 Cancer: Drivers of Antitumor Immunity, Immunosuppression, or Bystander Sentinels in  
833 Disease? *Front Immunol* **8**, 1830, doi:10.3389/fimmu.2017.01830 (2017).
- 834 34 Austyn, J. M. & Gordon, S. F4/80, a monoclonal antibody directed specifically against the  
835 mouse macrophage. *Eur J Immunol* **11**, 805-815, doi:10.1002/eji.1830111013 (1981).
- 836 35 Antonyak, M. A. *et al.* Cancer cell-derived microvesicles induce transformation by  
837 transferring tissue transglutaminase and fibronectin to recipient cells. *Proc Natl Acad Sci*  
838 *U S A* **108**, 4852-4857, doi:10.1073/pnas.1017667108 (2011).
- 839 36 Wang, T. *et al.* Hypoxia-inducible factors and RAB22A mediate formation of  
840 microvesicles that stimulate breast cancer invasion and metastasis. *Proc Natl Acad Sci U*  
841 *S A* **111**, E3234-3242, doi:10.1073/pnas.1410041111 (2014).
- 842 37 Mizushima, N., Yoshimori, T. & Levine, B. Methods in mammalian autophagy research.  
843 *Cell* **140**, 313-326, doi:10.1016/j.cell.2010.01.028 (2010).
- 844 38 Mauthe, M. *et al.* Chloroquine inhibits autophagic flux by decreasing autophagosome-  
845 lysosome fusion. *Autophagy* **14**, 1435-1455, doi:10.1080/15548627.2018.1474314 (2018).
- 846 39 Mizushima, N. & Komatsu, M. Autophagy: renovation of cells and tissues. *Cell* **147**, 728-  
847 741, doi:10.1016/j.cell.2011.10.026 (2011).
- 848 40 Levine, B. & Kroemer, G. Biological Functions of Autophagy Genes: A Disease  
849 Perspective. *Cell* **176**, 11-42, doi:10.1016/j.cell.2018.09.048 (2019).

- 850 41 Willms, E., Cabanas, C., Mager, I., Wood, M. J. A. & Vader, P. Extracellular Vesicle  
851 Heterogeneity: Subpopulations, Isolation Techniques, and Diverse Functions in Cancer  
852 Progression. *Front Immunol* **9**, 738, doi:10.3389/fimmu.2018.00738 (2018).
- 853 42 Mulcahy, L. A., Pink, R. C. & Carter, D. R. Routes and mechanisms of extracellular vesicle  
854 uptake. *J Extracell Vesicles* **3**, doi:10.3402/jev.v3.24641 (2014).
- 855 43 van Dongen, H. M., Masoumi, N., Witwer, K. W. & Pegtel, D. M. Extracellular Vesicles  
856 Exploit Viral Entry Routes for Cargo Delivery. *Microbiol Mol Biol Rev* **80**, 369-386,  
857 doi:10.1128/MMBR.00063-15 (2016).
- 858 44 Imai, T. *et al.* Macrophage-dependent clearance of systemically administered B16BL6-  
859 derived exosomes from the blood circulation in mice. *J Extracell Vesicles* **4**, 26238,  
860 doi:10.3402/jev.v4.26238 (2015).
- 861 45 Costa-Silva, B. *et al.* Pancreatic cancer exosomes initiate pre-metastatic niche formation  
862 in the liver. *Nat Cell Biol* **17**, 816-826, doi:10.1038/ncb3169 (2015).
- 863 46 Caruso, S. & Poon, I. K. H. Apoptotic Cell-Derived Extracellular Vesicles: More Than Just  
864 Debris. *Front Immunol* **9**, 1486, doi:10.3389/fimmu.2018.01486 (2018).
- 865 47 Peinado, H. *et al.* Melanoma exosomes educate bone marrow progenitor cells toward a pro-  
866 metastatic phenotype through MET. *Nat Med* **18**, 883-891, doi:10.1038/nm.2753 (2012).
- 867 48 Hoshino, A. *et al.* Tumour exosome integrins determine organotropic metastasis. *Nature*  
868 **527**, 329-335, doi:10.1038/nature15756 (2015).
- 869 49 Poste, G. & Nicolson, G. L. Arrest and metastasis of blood-borne tumor cells are modified  
870 by fusion of plasma membrane vesicles from highly metastatic cells. *Proc Natl Acad Sci*  
871 *U S A* **77**, 399-403, doi:10.1073/pnas.77.1.399 (1980).

- 872 50 Guo, M. *et al.* Autologous tumor cell-derived microparticle-based targeted chemotherapy  
873 in lung cancer patients with malignant pleural effusion. *Sci Transl Med* **11**,  
874 doi:10.1126/scitranslmed.aat5690 (2019).
- 875 51 Plebanek, M. P. *et al.* Pre-metastatic cancer exosomes induce immune surveillance by  
876 patrolling monocytes at the metastatic niche. *Nat Commun* **8**, 1319, doi:10.1038/s41467-  
877 017-01433-3 (2017).
- 878 52 Probert, C. *et al.* Communication of prostate cancer cells with bone cells via extracellular  
879 vesicle RNA; a potential mechanism of metastasis. *Oncogene* **38**, 1751-1763,  
880 doi:10.1038/s41388-018-0540-5 (2019).
- 881 53 Furesi, G., Rauner, M. & Hofbauer, L. C. Emerging Players in Prostate Cancer-Bone Niche  
882 Communication. *Trends Cancer* **7**, 112-121, doi:10.1016/j.trecan.2020.09.006 (2021).
- 883 54 Mates, L. *et al.* Molecular evolution of a novel hyperactive Sleeping Beauty transposase  
884 enables robust stable gene transfer in vertebrates. *Nat Genet* **41**, 753-761,  
885 doi:10.1038/ng.343 (2009).
- 886 55 McCabe, J. B. & Berthiaume, L. G. Functional roles for fatty acylated amino-terminal  
887 domains in subcellular localization. *Mol Biol Cell* **10**, 3771-3786,  
888 doi:10.1091/mbc.10.11.3771 (1999).
- 889 56 Hall, M. P. *et al.* Engineered luciferase reporter from a deep sea shrimp utilizing a novel  
890 imidazopyrazinone substrate. *ACS Chem Biol* **7**, 1848-1857, doi:10.1021/cb3002478  
891 (2012).
- 892 57 Huang, S. *et al.* An improved protocol for isolation and culture of mesenchymal stem cells  
893 from mouse bone marrow. *J Orthop Translat* **3**, 26-33, doi:10.1016/j.jot.2014.07.005  
894 (2015).

- 895 58 Rejman, J., Oberle, V., Zuhorn, I. S. & Hoekstra, D. Size-dependent internalization of  
896 particles via the pathways of clathrin- and caveolae-mediated endocytosis. *Biochem J* **377**,  
897 159-169, doi:10.1042/BJ20031253 (2004).
- 898 59 Cong, L. *et al.* Multiplex genome engineering using CRISPR/Cas systems. *Science* **339**,  
899 819-823, doi:10.1126/science.1231143 (2013).
- 900 60 Shelke, G. V., Lasser, C., Gho, Y. S. & Lotvall, J. Importance of exosome depletion  
901 protocols to eliminate functional and RNA-containing extracellular vesicles from fetal  
902 bovine serum. *J Extracell Vesicles* **3**, doi:10.3402/jev.v3.24783 (2014).
- 903 61 Liu, F. *et al.* The Exosome Total Isolation Chip. *ACS Nano* **11**, 10712-10723,  
904 doi:10.1021/acsnano.7b04878 (2017).
- 905 62 Midekessa, G. *et al.* Zeta Potential of Extracellular Vesicles: Toward Understanding the  
906 Attributes that Determine Colloidal Stability. *ACS Omega* **5**, 16701-16710,  
907 doi:10.1021/acsomega.0c01582 (2020).
- 908 63 Kowal, J. *et al.* Proteomic comparison defines novel markers to characterize heterogeneous  
909 populations of extracellular vesicle subtypes. *Proc Natl Acad Sci U S A* **113**, E968-977,  
910 doi:10.1073/pnas.1521230113 (2016).
- 911 64 Banfer, S. *et al.* Molecular mechanism to recruit galectin-3 into multivesicular bodies for  
912 polarized exosomal secretion. *Proc Natl Acad Sci U S A* **115**, E4396-E4405,  
913 doi:10.1073/pnas.1718921115 (2018).
- 914 65 Katayama, H. *et al.* Visualizing and Modulating Mitophagy for Therapeutic Studies of  
915 Neurodegeneration. *Cell* **181**, 1176-1187 e1116, doi:10.1016/j.cell.2020.04.025 (2020).
- 916 66 Stacer, A. C. *et al.* NanoLuc reporter for dual luciferase imaging in living animals. *Mol*  
917 *Imaging* **12**, 1-13 (2013).

918 **Supporting Information**

919

920 *In vitro* and *in vivo* analysis of microvesicle-mediated metastasis using a  
921 bright, red-shifted bioluminescent reporter protein of extracellular vesicles

922

923 **Authors**

924 Ahmed A. Zarea<sup>\*1</sup>, Gloria I. Perez<sup>\*1,2</sup>, David Broadbent<sup>1,2</sup>, Benedikt Dolgikh<sup>1,4</sup>, Matthew  
925 P. Bernard<sup>1,3</sup>, Alicia Withrow<sup>8</sup>, Amelia McGill<sup>1</sup>, Victoria Toomajian<sup>1,5</sup>, Lukose K.  
926 Thampy<sup>1,2</sup>, Jack Harkema<sup>3</sup>, Joel R. Walker<sup>9</sup>, Thomas A. Kirkland<sup>9</sup>, Michael H.  
927 Bachmann<sup>1,6</sup>, Jens Schmidt<sup>1,7</sup>, and Masamitsu Kanada<sup>\*\*1,3</sup>

928

929

930 **Affiliations**

931 <sup>1</sup>Institute for Quantitative Health Science and Engineering (IQ), <sup>2</sup>College of Osteopathic  
932 Medicine, <sup>3</sup>Department of Pharmacology & Toxicology, <sup>4</sup>College of Natural Science,  
933 <sup>5</sup>Department of Biomedical Engineering, <sup>6</sup>Department of Microbiology & Molecular  
934 Genetics, <sup>7</sup>Department of Obstetrics and Gynecology, College of Human Medicine,  
935 <sup>8</sup>Center for Advanced Microscopy, Michigan State University, East Lansing, Michigan.  
936 <sup>9</sup>Promega Biosciences LLC, 227 Granada Dr, San Luis Obispo, CA.

937

938 \*These authors contributed equally to this work.

939

940 \*\*Correspondence and requests for materials should be addressed to M.K. (email:  
941 [kanadama@msu.edu](mailto:kanadama@msu.edu)).

942

943

944



945  
946  
947

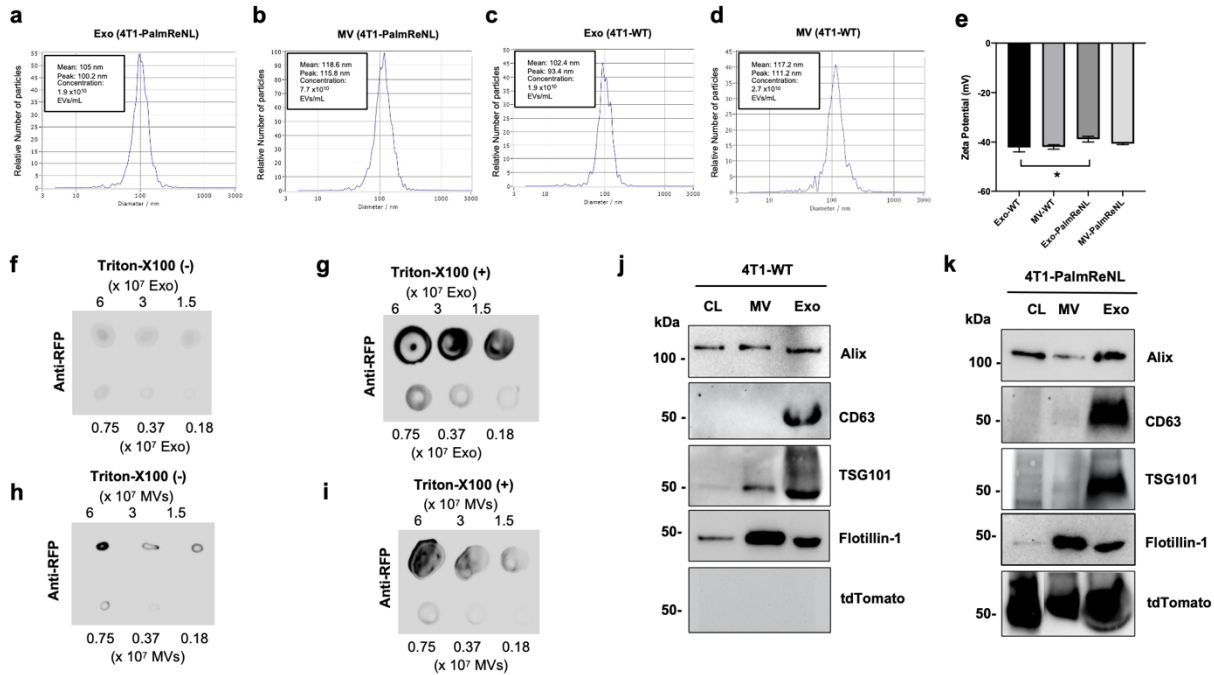

948  
949  
950  
951  
952  
953  
954  
955  
956  
957  
958  
959  
960  
961  
962  
963  
964  
965  
966  
967  
968  
969

**Supplementary Figure 1. Characterization of 4T1 cell-derived PalmReNL-EVs.** **a-d** 4T1 cell-derived PalmReNL-exosomes and -MVs were analyzed by nanoparticle tracking analysis (NTA). Exosomes and MVs derived from unmodified 4T1 cells were analyzed as control. **e** Determination of the Zeta potential revealed that the PalmReNL slightly shifted the surface charge of exosomes, but not MVs. Error bars, SD (n = 3), \*, P < 0.05. **f, g, h, i** Dot blot assays for PalmReNL-exosomes and -MVs plus or minus Triton-X100. **j** Western blot analysis of exosome marker proteins of unmodified 4T1 cells, MVs, and exosomes. **k** Western blot analysis of exosome marker proteins of PalmReNL-4T1 cells, -MVs, and -exosomes.

970  
971

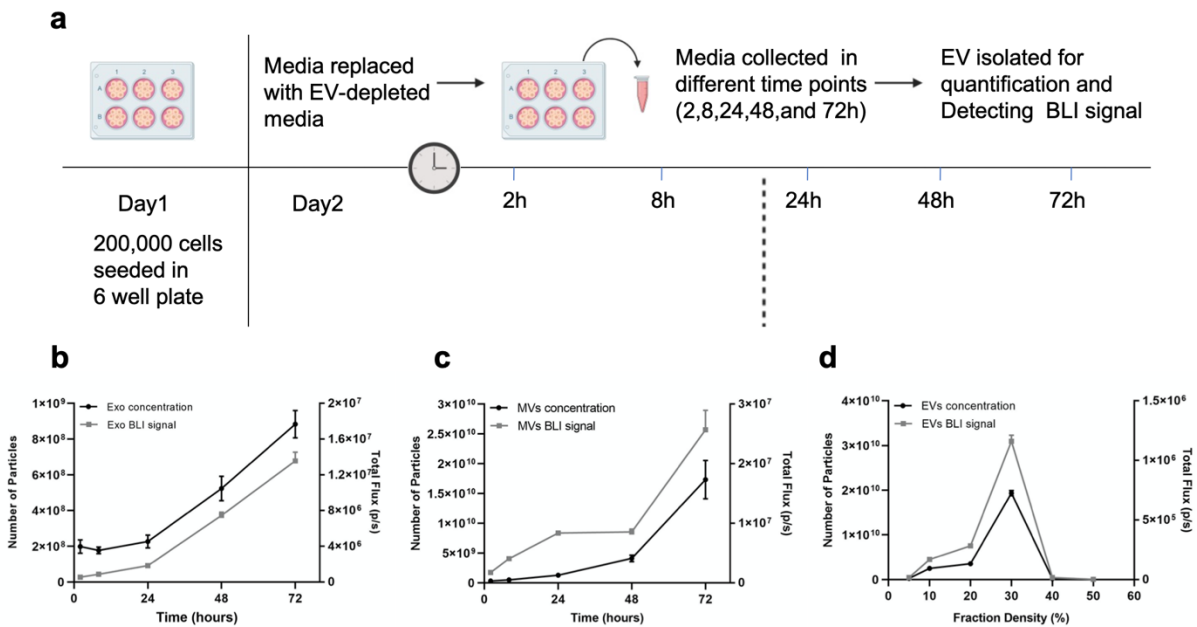

972  
973  
974  
975  
976  
977

978 **Supplementary Figure 2. Characterization of EV release from 4T1 cells *in vitro*.**  
979 Schematic representation of the sampling protocol. **b, c** The bioluminescent signals  
980 correlated with the number of particles present. **d** The bioluminescent signals were also  
981 correlated with the number of EVs purified from different EV fractions after density  
982 gradient. Error bars, SD (NTA, n=3; BLI, n=9).

983  
984  
985  
986  
987  
988  
989  
990  
991  
992  
993  
994

995  
996  
997

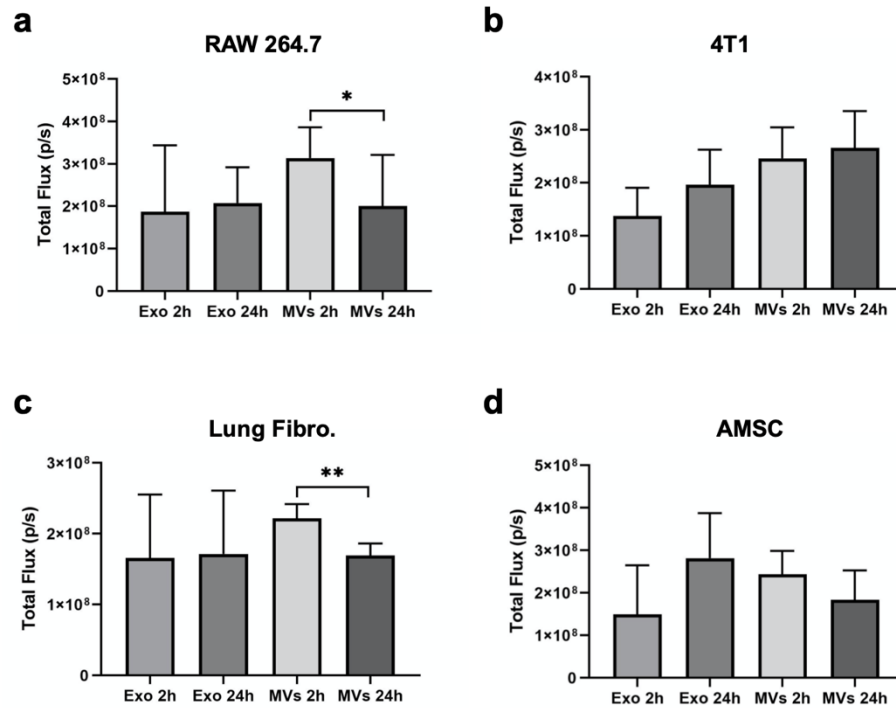

998  
999  
1000  
1001  
1002  
1003  
1004  
1005  
1006  
1007  
1008  
1009  
1010  
1011  
1012  
1013  
1014  
1015  
1016  
1017  
1018  
1019  
1020  
1021

**Supplementary Figure 3. Short-term and long-term cellular uptake of 4T1 cell-derived PalmReNL-exosomes and -MVs assessed by measuring bioluminescent signals.** **a** Macrophage RAW 264.7 cells. **b** 4T1 cells. **c** Mouse lung fibroblasts. **d** Mouse adipose-derived mesenchymal stromal cells (AMSCs). Error bars, SD (n = 8), \*, P < 0.05; \*\*, P < 0.01.

1022

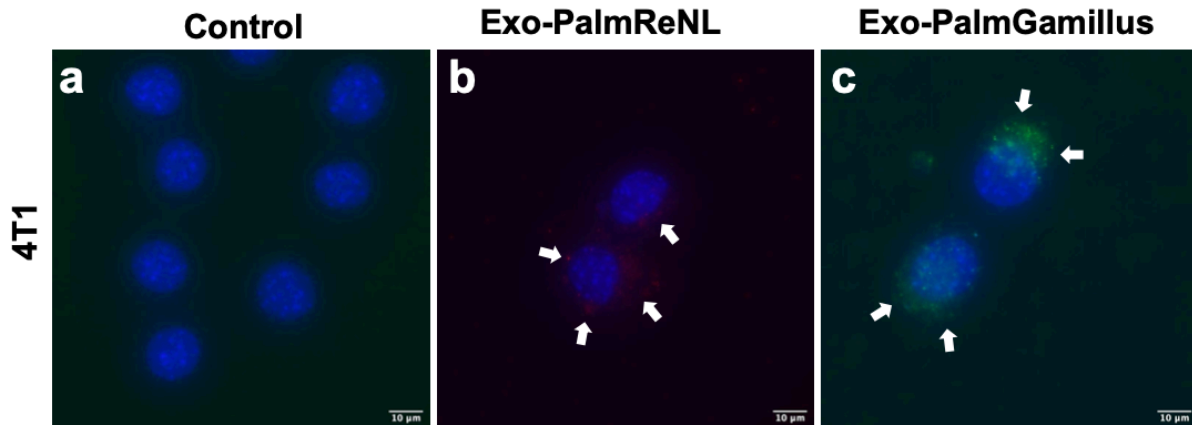

1023

1024

1025

1026

1027

1028

1029

1030

1031 **Supplementary Figure 4. Retained fluorescence signals of PalmGamillus-**  
1032 **exosomes in the recipient cells compared to the PalmReNL-exosome signal which**  
1033 **was barely detected.** Fluorescence microscopy images of 4T1 cells treated for 24 h with  
1034 PalmReNL- or PalmGamillus-exosomes. White arrows, PalmReNL- or -PalmGamillus-  
1035 exosomes.

1036

1037

1038

1039

1040

1041

1042

1043

1044

1045

1046

1047

1048

1049

1050

1051

1052

1053

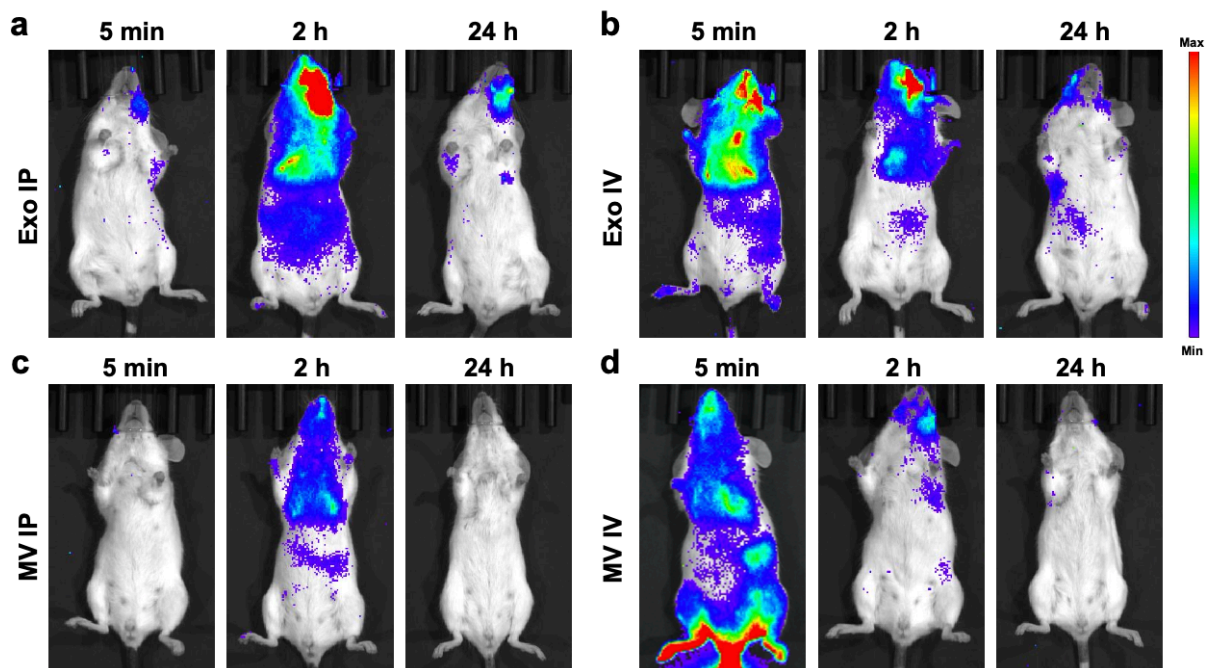

1054  
1055  
1056  
1057

1058 **Supplementary Figure 5. Dynamic biodistributions of PalmReNL-exosomes and -**  
1059 **MVs following retro-orbital (i.v.) or intraperitoneal (i.p.) injections. a-d**  
1060 **Representative biodistributions of the reporter PalmReNL-EVs (n = 3). *In vivo* BLI at 5**  
1061 **min, 2 h, and 24 h after injecting reporter PalmReNL-exosomes and -MVs. Furimazine**  
1062 **(Fz) was administered retro-orbitally.**

1063  
1064  
1065  
1066  
1067  
1068  
1069  
1070  
1071  
1072  
1073  
1074  
1075

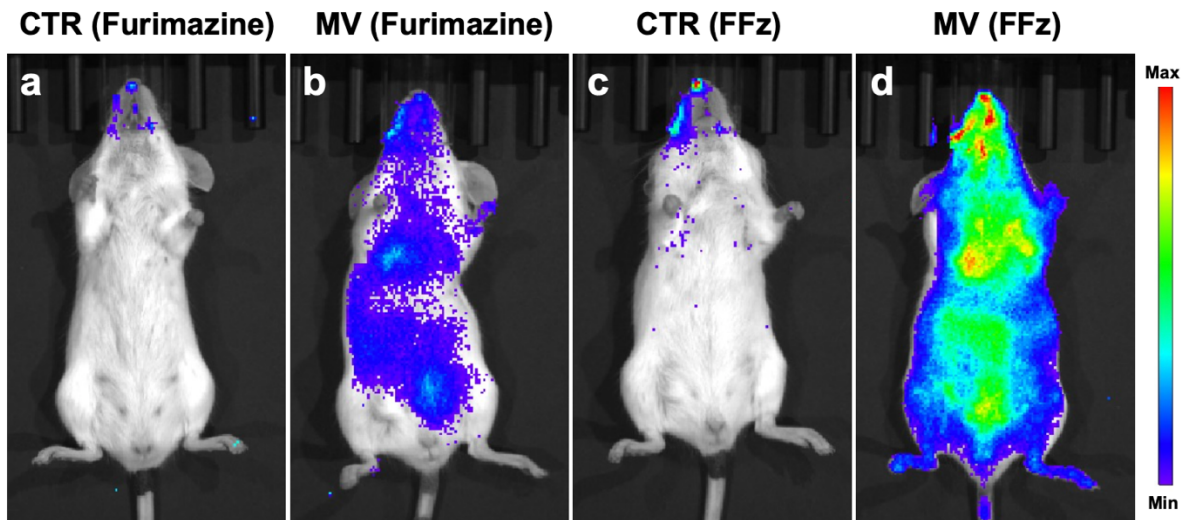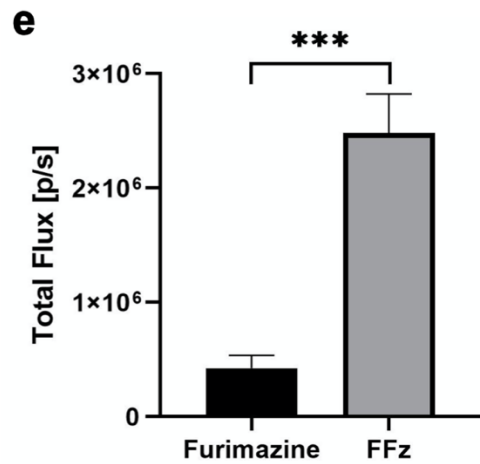

1076  
1077  
1078  
1079  
1080  
1081  
1082  
1083  
1084  
1085  
1086  
1087  
1088  
1089  
1090  
1091  
1092

**Supplementary Figure 6. Enhanced bioluminescent signals of PalmReNL-MVs when Fluorofurimazine (FFz) was used as the substrate *in vivo*.** a, c Control mice. b, e The bioluminescent signal of i.p. injected PalmReNL-MVs using furimazine as the substrate after. d, e The sensitivity of the reporter PalmReNL-MVs administered intraperitoneally was markedly increased when FFz was used as the substrate; Error bars, SEM (n = 5), \*\*\*, P < 0.001.

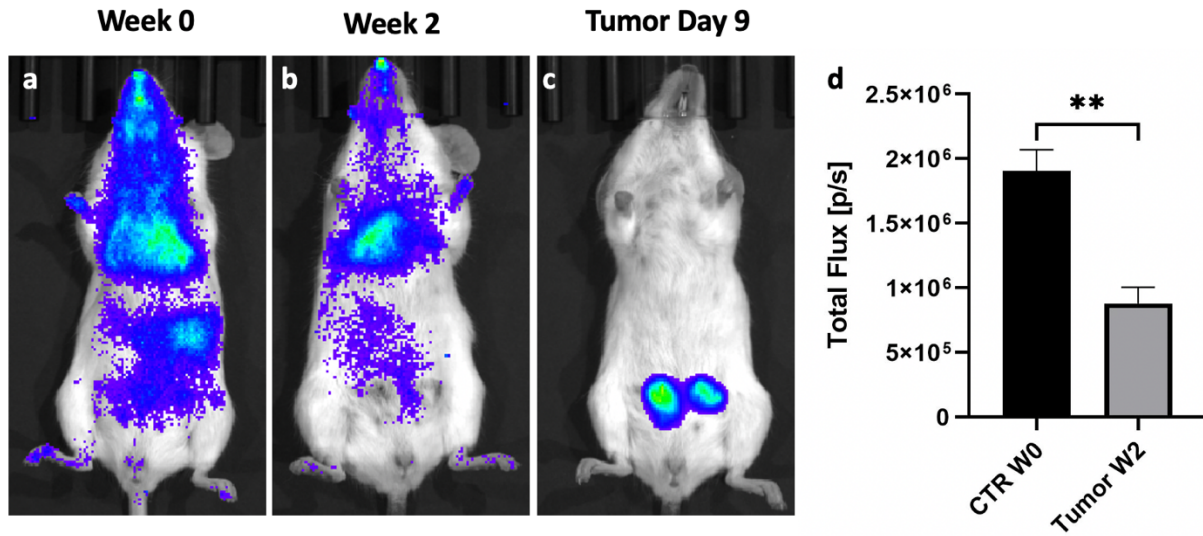

1093  
1094  
1095  
1096  
1097  
1098  
1099

**Supplementary Figure 7. Lower bioluminescent signals of the reporter MVs-PalmReNL detected in tumor-bearing mice compared to the healthy mice.** Bioluminescent signals of the PalmReNL-MVs in mice with and without tumors. **a** Control mice. **b** Mammary tumor-bearing mice two week after tumor implantation. **c** Mammary tumor growth was assessed by fLuc BLI. **d** Quantitative analysis of the bioluminescent signals of PalmReNL-MVs *in vivo* for each one of the experimental groups. Error bars, SEM (n = 4), \*\*, P = 0.002.

1107  
1108  
1109  
1110  
1111  
1112  
1113  
1114  
1115  
1116  
1117  
1118  
1119  
1120  
1121  
1122  
1123  
1124

1125

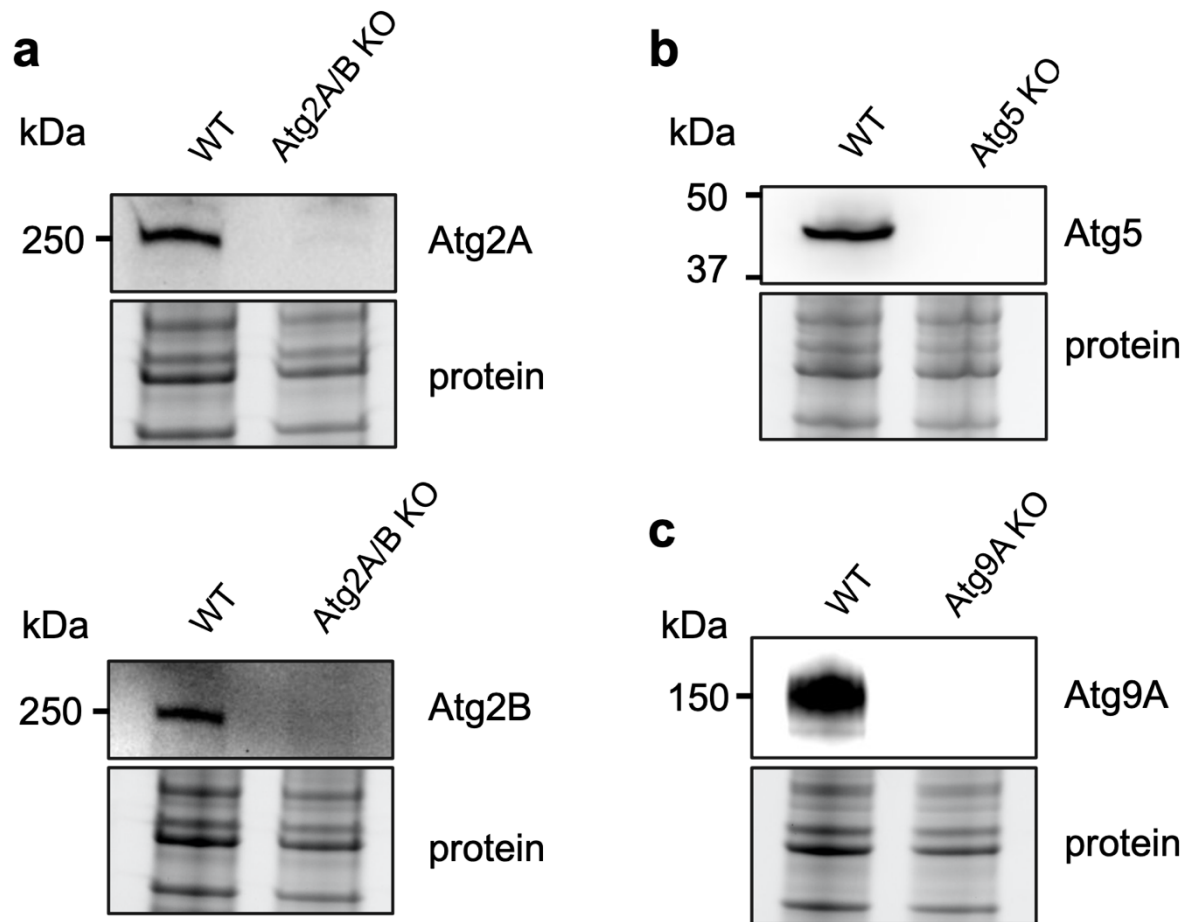

1126  
1127  
1128  
1129  
1130  
1131  
1132  
1133  
1134  
1135  
1136  
1137  
1138  
1139  
1140  
1141  
1142  
1143  
1144  
1145

**Supplementary Figure 8. Characterization of Atg KO U2OS cells. a-c** Western blot characterization of U2OS Atg KO cell lines. **a** Atg2A/B KO cells; **b** Atg5 KO cells; **c** Atg9A KO cells. Whole-cell lysates were shown as a loading control.



1146  
1147  
1148  
1149  
1150  
1151  
1152

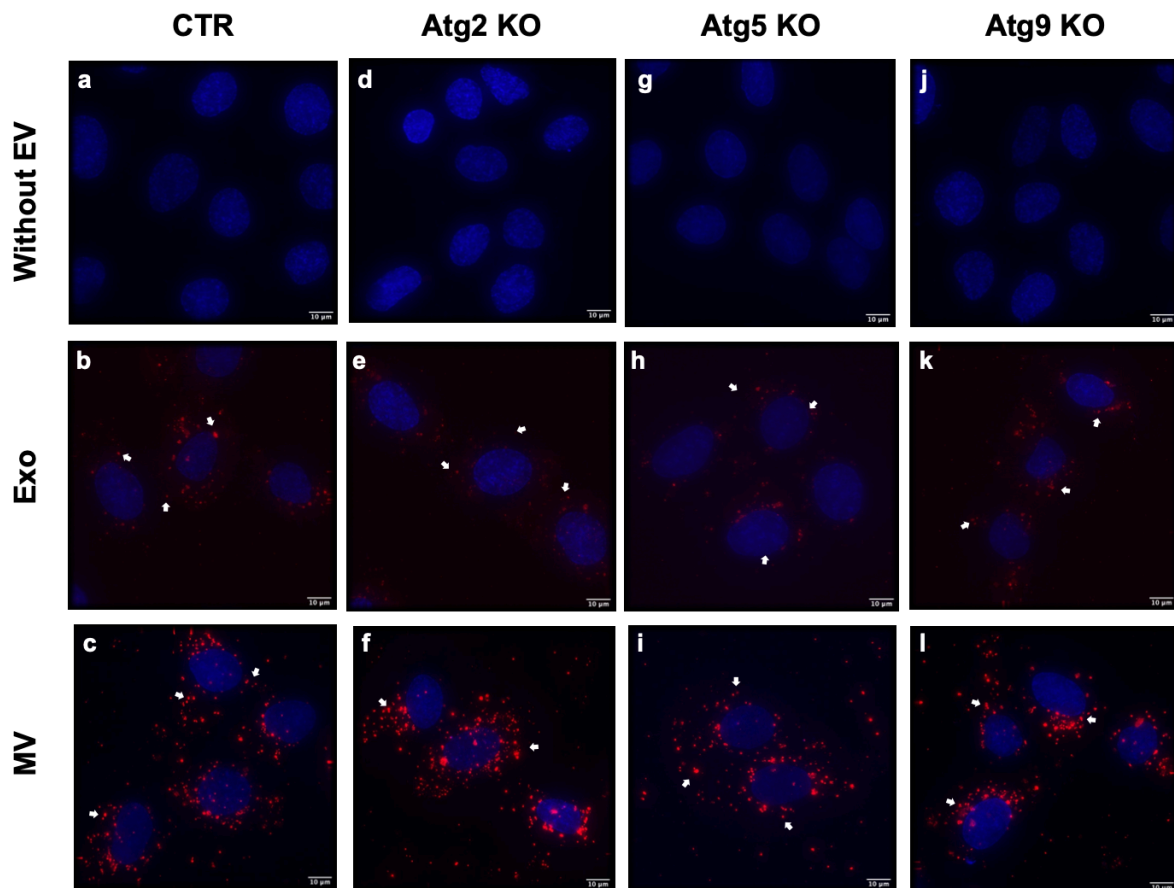

1153  
1154  
1155  
1156  
1157  
1158  
1159  
1160  
1161  
1162  
1163  
1164  
1165  
1166

**Supplementary Figure 9. Autophagy involvement in cellular uptake of exosomes- and MVs-PalmReNL.** a-c Control cells; d-f Atg2 KO cells; g-i Atg5 KO cells; j-l Atg9 KO cells. Punctate signals of RFP (red) were merged with nuclei stained with Hoechst 33342 (blue). Scale bar, 10 µm. Arrows indicate RFP signals in PalmReNL-exosomes and -MVs taken up by the recipient U2OS cells.

1167  
1168

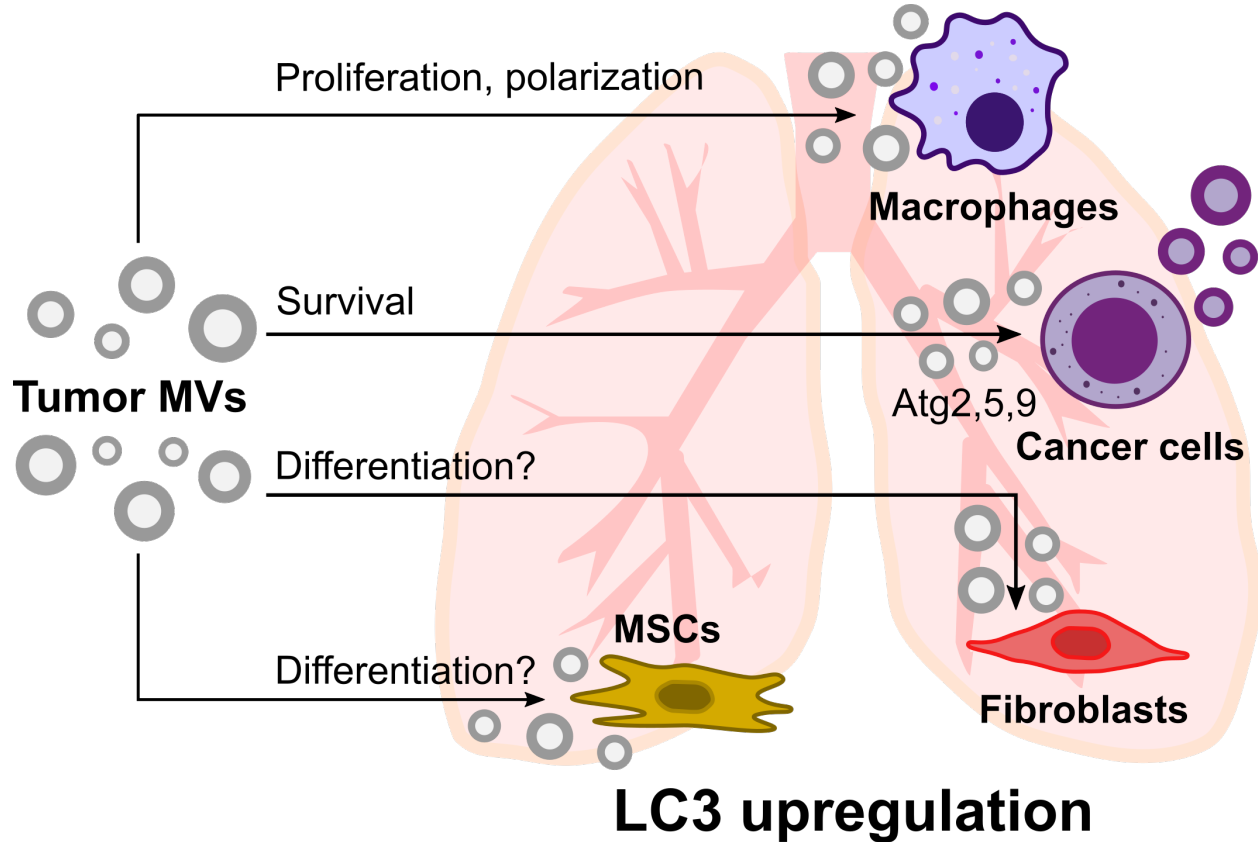

1169  
1170  
1171  
1172  
1173  
1174  
1175  
1176  
1177  
1178  
1179  
1180  
1181  
1182  
1183

**Supplementary Figure 10. Schematic representation of metastatic cancer cell survival in the lung promoted by MVs from primary tumors.** MVs released from primary tumors preferentially accumulate in the lung and affect various cell types, including macrophages, cancer cells, fibroblasts, and mesenchymal stromal cells (MSCs). Overall intercellular communication activates LC3 in the lung tissue and suppresses the anti-tumor response. Atg2, 5, and 9 proteins are directly and/or indirectly involved in metastatic cancer cells' EV uptake and release.
